# Multimodal and Quantitative Analysis of the Epileptogenic Zone in the Pre-Surgical Evaluation of Drug-Resistant Focal Epilepsy

Hamid Karimi-Rouzbahani<sup>1,2,7\*</sup>, Simon Vogrin<sup>3-5\*</sup>, Miao Cao<sup>6</sup>, Chris Plummer<sup>3,4\*\*</sup>, Aileen McGonigal<sup>1,2,7\*\*</sup>

<sup>1</sup>Department of Neurosciences, Mater Misericordiae Hospital, Brisbane, Queensland, Australia

<sup>2</sup>Mater Research Institute, Faculty of Medicine, University of Queensland, Australia

<sup>3</sup>Department of Neurology, St Vincent's Hospital, Fitzroy, Australia

<sup>4</sup>School of Health Sciences, Swinburne University of Technology, Hawthorn, Australia

<sup>5</sup>Department of Medicine, University of Melbourne, Parkville, Australia

<sup>6</sup>Swinburne Neuroimaging Facility, Swinburne University of Technology, Hawthorn, Australia

<sup>7</sup>Queensland Brain Institute, University of Queensland, Australia

\*Joint first author

\*\*Joint last author

Correspondence to: Hamid Karimi-Rouzbahani  
hamid.karimi-rouzbahani@mater.org.au

## Abstract

Surgical resection for epilepsy often fails due to incomplete Epileptogenic Zone (EZ) localization from standard electroencephalography (EEG), stereo-EEG (SEEG), and Magnetic Resonance Imaging (MRI). Subjective interpretation based on interictal, or ictal recordings limits conventional EZ localization. This study employs multimodal analysis using high-density-EEG (HDEEG), Magnetoencephalography (MEG), functional-MRI (fMRI), and SEEG to overcome these limitations in a patient with drug-resistant MRI-negative focal epilepsy. A teenage boy with drug-resistant epilepsy underwent evaluation. HDEEG, MEG, fMRI, and SEEG were used, with a novel HDEEG-cap facilitating simultaneous EEG-MEG and EEG-fMRI recordings. Electrical and magnetic source imaging were performed, and fMRI data were analysed for homogenous regions. SEEG analysis involved spike detection, spike timing analysis, ictal fast activity quantification, and Granger-based connectivity analysis. Non-invasive sessions revealed consistent interictal source imaging results identifying the EZ in the right anterior cingulate cortex. EEG-fMRI highlighted broader activation in the right cingulate cortex. SEEG analysis localized spikes and fast activity in the right anterior and posterior cingulate gyri. Multi-modal analysis suggested the EZ in the right frontal lobe, primarily involving the anterior and mid-cingulate cortices. Multi-modal non-invasive analyses can optimise SEEG implantation and surgical decision-making. Invasive analyses corroborated non-invasive findings, emphasising the importance of individual-case quantitative analysis across modalities in complex epilepsy cases.

## Keywords

epilepsy, epileptogenic zone localisation, high density EEG, MEG, source imaging, fMRI, stereo-

41 EEG, multi-modal analysis

## 42 Introduction

43 There are over 50 million people with epilepsy worldwide [14]. Anti-seizure medications (ASMs)  
44 cannot adequately control the disorder in at least 30% of cases [34]. If the epilepsy is considered  
45 focal (seizures arising from part of one hemisphere) [15], those with drug-resistant focal epilepsy  
46 may undergo presurgical evaluation to detect those areas that are critical for the generation of  
47 seizure activity. These areas have been variably termed the epileptogenic zone (EZ) or the  
48 epileptogenic network. The goal of surgery is to laser-ablate, resect, or disconnect the EZ by  
49 sacrificing the least amount of brain tissue to render the patient seizure free while avoiding the  
50 creation of a functional deficit.

51  
52 The inherent complexity of the epileptogenic zone (EZ) and our limited ability to reliably and  
53 accurately localise it contributes to the failure of the surgical approach to achieve long-term seizure  
54 freedom for these patients [40]. Putting aside any conceptual considerations of how best to define  
55 the EZ [39,46], this problem is under-pinned by two key factors - the inability of any single imaging  
56 modality to routinely define the EZ and the subjectivity that is routinely brought to the analysis and  
57 interpretation of the recorded data. For example, standard magnetic resonance imaging (MRI), scalp  
58 electroencephalography (EEG) and stereo-EEG (SEEG) provide incomplete, albeit somewhat  
59 complementary, views of the brain. Specifically, functional MRI (fMRI) provides images of the brain  
60 at high spatial resolution (mm-scale), while lacking the necessary temporal resolution to delineate  
61 the rapidly changing brain activities typical of epileptiform discharges. MRI methods generally record  
62 resting state (interictal) activity between seizures (spikes and sharps). Standard low-density scalp  
63 EEG, on the other hand, provides sufficient temporal resolution (ms-scale) and allows study of both  
64 seizure (ictal) and interictal periods. However, its lower spatial resolution (cm-scale), which is  
65 affected by the complex and often imperfectly modelled electromagnetic properties of the tissues  
66 between the brain and the recording electrodes (primarily the skull) limits precise localisation of  
67 signal sources. The use of more recording electrodes with High density EEG (HDEEG) (at least 64  
68 electrodes that includes a minimum three-pair inferior temporal electrode chain) combined with  
69 realistic MRI-individualised head models for electrical source imaging (ESI) partly alleviates this  
70 limitation (to at best 4-6cm<sup>2</sup>). While less available, magnetoencephalography (MEG) for magnetic  
71 source imaging (MSI), is less influenced by tissue interfaces and has a better spatial resolution (to at  
72 best 1-3cm<sup>2</sup>). However, like MRI-based techniques, the requirement for patients to remain still for  
73 both HDEEG and MEG usually limits their data capture to interictal events. In patients in whom  
74 invasive recording is deemed necessary for presurgical evaluation, SEEG can potentially overcome  
75 these issues with its high temporal and spatial resolution of anatomical correlates of interictal and

76 ictal activity in the context of seizure clinical characteristics (semiology) captured during video scalp  
77 EEG monitoring. The additional advantage of SEEG over scalp EEG is that SEEG has minimal  
78 artefact from muscle contraction and movement during the ictal recording that can significantly  
79 distort the neural signals recorded during seizures. The downside of SEEG is its under-sampling of  
80 the brain - the number and positioning of implanted electrodes is limited by safety and technical  
81 measures such that only 5-10% of the brain is routinely sampled. The implication is that the SEEG  
82 trajectories are determined by EZ hypotheses formulated from the clinical teams' interpretation of all  
83 the available non-invasively acquired data and the clinical presentation. The more experienced the  
84 clinical team and the higher the quality of the non-invasive datasets, then the higher the quality of  
85 the hypothesis for EZ localisation and the higher the likelihood that the true EZ will actually be  
86 sampled during the SEEG monitoring period. Therefore, these distinct recording modalities, in the  
87 context of expert interpretation, provide complementary views of the brain. As each of the above  
88 modalities (scalp EEG, MEG, SEEG, MRI and fMRI) provides specific benefits over one another,  
89 and based on the marked heterogeneity of epilepsy across individuals making the localisation  
90 difficult, one solution might be to utilise complementary strengths of multi-modal brain recording for  
91 clinical localisation of the EZ. This work evaluates the additional value of combining multiple brain  
92 recording data including high-density EEG (HDEEG), magnetoencephalography (MEG), fMRI and  
93 SEEG for the localisation of the EZ.

94  
95 Another critical issue in EZ localisation is that conventional localisation of the EZ (and the potentially  
96 wider epileptogenic network) is generally reliant on subjective and qualitative interpretation of the  
97 available data. For example, structural MRI images are visually inspected for the detection of  
98 potential lesions and dysplasia. Hours of EEG and SEEG data are inspected to detect patient-  
99 specific epileptiform patterns of activity including established patterns such as low-voltage fast  
100 activity (LVFA) [36] in the ictal period or high-frequency oscillations (HFOs) and spike activity [9,50]  
101 during interictal periods. The level of expertise of the clinicians in their interpretation of data and the  
102 associated inter-rater variability can significantly impact the working hypothesis for the likely EZ  
103 localisation. Moreover, the complexity and the patient-specific nature of epileptiform brain activity  
104 can create challenges for the clinician to discriminate epileptiform activity from healthy brain activity  
105 [16]. To help overcome these issues, semi-automated and automated quantitative methods for the  
106 localisation of EZ has been developed for each modality separately.

107  
108 We previously described approaches to the localisation of the EZ using HDEEG and MEG  
109 [4,5,42,51]. Specifically, we found that the earliest localisable interictal and ictal activity is a more  
110 accurate marker of the origin and extent of the EZ rather than later phase activity at either the mid-  
111 upswing or peak phases of these discharges. While the latter phases have been traditionally ear-  
112 marked as the most reliable time-point for source imaging solutions on account of the higher SNR

113 characteristics, we found that this activity is commonly contaminated by the effects of cortico-cortical  
114 propagation for both interictal and ictal discharges. We also found that the combination of HDEEG  
115 and MEG carries complementary non-redundant source imaging information for non-invasive pre-  
116 surgical mapping of the likely EZ. A particular advantage of HDEEG based ESI is that its  
117 reproducibility can be assessed for solution stability between HDEEG-MEG and HDEEG-fMRI  
118 recordings across sequential sessions. That is, not only can the HDEEG inform the timing of the  
119 fMRI BOLD response, but it can also serve to define a second ESI result that can be cross-checked  
120 with that obtained from the HDEEG during the earlier HDEEG-MEG acquisition.

121

122 Despite the reduced temporal resolution of fMRI against EEG, MEG and SEEG, its high spatial  
123 resolution offers unique insights into secondary haemodynamic features correlated with neuronal  
124 activation related to interictal and ictal discharges. Approaches typically employed for fMRI include a  
125 priori model-driven analyses (such as general linear modelling, GLM, using canonical  
126 haemodynamic response functions), data-driven analyses (via Independent Component Analysis,  
127 ICA) and functional connectivity exploration (via Regional Homogeneity, ReHo metrics). The GLM  
128 approach is dependent upon simultaneously acquired EEG (EEG-informed fMRI), while ICA and  
129 ReHo approaches do not rely on co-acquired EEG data.

130

131 In SEEG, quantitative EZ localisation methods have been growing in the past two decades. These  
132 methods quantify patterns of epileptogenic activity either in the interictal period (e.g., spikes, sharps,  
133 HFOs, or complex signals, [32]) or ictal period (e.g., slow shifts and LVFA, [36]). Recent studies  
134 have localised the EZ by tracking epileptogenic patterns of activity from one area to another using  
135 connectivity techniques such as latency of spike activity [11,47] in the interictal period or connectivity  
136 metrics in the ictal period [18,19,38]. These connectivity approaches build upon previous studies  
137 that looked at individual brain areas to localise the EZ and are supported by growing evidence  
138 suggesting that focal epilepsy is a network disorder rather than a localised brain disorder [33,48,52].  
139 We recently showed the additional information that connectivity measures provide to the elucidation  
140 of the EZ [32].

141

142 In light of the modality-specific limitations of EZ localisation and motivated by recent shifts towards  
143 quantitative analyses of epilepsy, this study uses a combination of HDEEG, MEG, fMRI and SEEG  
144 based on a sequence of novel analyses. We take advantage of each modality's particular strength  
145 and show concordant multi-modal evidence for the location of the EZ in a patient with severe drug-  
146 resistant MRI-negative focal epilepsy, which in this complex case helped to refine SEEG  
147 implantation strategy and achieve satisfactory EZ localisation and ultimately treatment.

## 148 **Methods**

### 149 **Case**

150 A teenage boy with onset of epilepsy in childhood underwent presurgical evaluation for MRI-  
151 negative drug-resistant seizures. Despite two previous right prefrontal resections in another expert  
152 epilepsy centre in childhood (with evidence of focal cortical dysplasia type 2A on one resection), he  
153 continued to suffer daily (often 5-10 per day) hyperkinetic seizures, sometimes preceded by a sense  
154 of the heart racing or a sensation described by the patient as “a feeling in my heart and in my head”,  
155 and sometimes a feeling of being frightened. Objective seizure semiology was complex,  
156 characterised by partially retained awareness, vocalisation (where the patient could swear or shout  
157 “help”), pallor and abrupt, early onset of a hyperkinetic phase with rapid side-to-side pelvic and  
158 truncal movements while lying on the bed. Retained motor function of right arm was noted in some  
159 seizures (would grip the bedrail) and in about half of seizures he would turn to the prone position  
160 (via either the right or the left).

161  
162 There was no clear-cut tonic posturing, though he would sometimes have the left arm in a flexed  
163 position. There was not a clearly emotional facial expression, though the content of the vocalisation  
164 could suggest an emotional experience. There was no incontinence and he never had secondary  
165 generalisation. Seizures were brief (<1 minute), appeared stereotyped in their motor sequence and  
166 had rapid recovery to baseline (no post-ictal motor or language deficit). In recorded seizures the  
167 patient was noted to be pale and sweaty during the hyperkinetic and post-ictal phase. He could feel  
168 nauseated and sometimes vomit at seizure offset. Interictal neurological exam was normal;  
169 neuropsychiatry and neuropsychologic testing showed low-average intelligence, reduced executive  
170 function and attentional deficits.

171  
172 In terms of localising value of semiologic data, the presence of autonomic features (heart racing,  
173 pallor, sweating, nausea) suggested likely involvement of the central autonomic network (amygdala,  
174 anterior insula, anterior cingulate). The pattern of hyperkinetic motor behaviour suggested prefrontal  
175 and/or insular involvement at onset, with in particular turning to the prone position being suggestive  
176 of anterior or mid-cingulate involvement [41]. The very stereotyped pattern of seizures indicated a  
177 likely unifocal EZ, which was thought most likely to be within right frontal lobe, although independent  
178 or even primary EZ extra-frontal involvement of connected limbic structures (amygdala, insula) could  
179 not be excluded from the standard pre-surgical work-up. Indeed, interictal surface EEG during  
180 video-EEG monitoring showed sharp theta over right temporal and anterior suprasylvian regions. No  
181 discernible ictal EEG change was seen on video-EEG (22 seizures recorded). The SPECT was felt  
182 to be practically difficult (because of marked early hyperkinetic movements) but also not considered

183 likely to bring clinically useful spatial resolution with regards to timing of injection since propagation  
184 can be expected to be extremely fast in such cases. It also seemed unlikely that SPECT would  
185 change the SEEG implantation strategy. We thus proceeded to additional investigations to aid in  
186 hypotheses for SEEG planning for this patient's focal drug-resistant epilepsy. The patient has since  
187 undergone surgery (follow-up 6 months), with histopathology showing FCD 2A and marked  
188 improvement in seizure frequency and severity (Engel Class II).

189

190 Ethics approvals for this study were obtained from Institutional Review Board of Mater Misericordiae  
191 Ltd. Human Research Ethics Committee and Institutional Review Board of the Swinburne University  
192 of Technology. The patient consented to the multimodal investigation of his epilepsy at Mater  
193 Hospital and the Swinburne University of Technology. He also consented to the use of his data for  
194 research purposes and for publication.

## 195 **HDEEG and MEG**

196 The patient underwent a series of non-invasive multimodal investigations across four stages  
197 (HDEEG-only, HDEEG-MEG, HDEEG-fMRI, structural MRI-only) sequentially performed during a  
198 single recording session at Swinburne University of Technology, (Melbourne, Australia). A 134  
199 channel-HDEEG acquisition system (SynampRT™ EEG amplifier and Curry 9™ Acquisition  
200 software, Compumedics Neuroscan, Melbourne) was employed at each stage. To control for the  
201 comparability of identified epileptiform brain activity across a similar baseline brain state for each  
202 recording stage, the patient and their treating team consented to one of two typical clinical  
203 provocations to enhance the yield of interictal discharges: minor sleep deprivation (2 hours less  
204 sleep), withholding of morning antiseizure medications until after testing completed (while under the  
205 constant clinical supervision of one of the authors (CP)). The combined duration of the sessions was  
206 limited to less than six hours. A novel 134 electrode HDEEG cap (10-10 system with 12 electrode  
207 inferior temporal coverage) constructed from non-magnetising hardware components was integrated  
208 for use with the MicroMaglink™ passive filters (Compumedics Neuroscan, Melbourne). The set-up  
209 minimised external RF noise contamination of the MEG and MRI scanner environments, permitting  
210 sequential recordings of (i) HDEEG-only in an electrically shielded room, (ii) HDEEG-MEG in a  
211 magnetically shielded room simultaneous with the 306 sensor MEG scanner (Triux, Elekta Oy), and  
212 (iii) HDEEG-fMRI session inside the MRI scanner (3T Prisma FIT, Siemens, Erlangen) without the  
213 need to reapply the HDEEG cap across these different recording environments prior to  
214 considerations for SEEG investigation. The reproducibility of ESI (EEG source imaging) was,  
215 therefore, based on HDEEG alone, HDEEG during MEG, and HDEEG during fMRI. ESI and MSI  
216 (MEG source imaging) results were also compared.

## 217 **HDEEG**

218 HDEEG data were acquired at a sampling rate of 5 kHz (passband DC – 2kHz) across all stages  
219 (HDEEG-only, HDEEG-MEG, HDEEG-fMRI). HDEEG electrode positions, and PAN (pre-auricular,  
220 nasion) co-ordinates, along with samples of the cap surface, were digitised optical sensor tracker  
221 system (NDI Polaris Vicra®) in common space for MRI co-registration. Impedances were kept below  
222 10 kOhms.

## 223 **MEG**

224 The MEG data (102 magnetometers, 204 planar gradiometer) were sampled at 5000 Hz with anti-  
225 aliasing filter set at 1650 Hz. MEG head coils, HDEEG electrode positions, and PAN co-ordinates  
226 were re-digitized with an independent electromagnetic tracker (Polhemus Fastrak®). Bad channels  
227 for all MEG data were checked prior to applying temporal extension to signal source separation  
228 (tSSS) using Maxfilter® v2.2.15 (Elekta Oy) for interference suppression (correlation limit 0.98 and  
229 sliding window of 10 s). Independent 1-s interval clock triggers were captured on each system and  
230 used to synchronize HDEEG and MEG offline. The synchronisation was verified by comparing ECG  
231 channel signal phase from each independent modality. All HDEEG and MEG signals were reviewed  
232 and analysed using Curry 9 software. Applying a bandpass Hann-shaped FFT filter from 1 to 100 Hz  
233 (slope of 2 Hz, 50% transmission at 1 Hz; slope of –20 Hz, 50% transmission at 100 Hz), IEDs were  
234 manually identified by an experienced neurologist (C.P.) on HDEEG and MEG independent files  
235 using Curry 9™ (Compumedics Neuroscan, Hamburg). Independent-modality source localization  
236 (ESI, MSI) was performed. ESI and MSI were performed using (sLORETA) standardised low-  
237 resolution electromagnetic tomographic analysis (inverse model) and individualised MRI informed  
238 (BEM) boundary-element method (forward model) on averaged epileptiform discharges at different  
239 latency points (take-off, early-phase or earliest stable solution to explain 80% measured field, mid-  
240 phase or mid-upswing, late-phase or surface negative peak).

241

## 242 **HDEEG-fMRI**

243 Simultaneous HDEEG-fMRI was acquired using a Multi-Echo Multi-Band (MEMB) sequence in a 3T  
244 Siemens PrismaFIT MRI scanner with a 32-channel head coil, with SynampRT amplifier  
245 synchronised to the 10MHz MRI clock signal. First, a high-resolution 3D T1-weighted magnetisation-  
246 prepared rapid acquisition with gradient echo (MPRAGE) anatomical image was acquired with  
247 TR/TE = 1900/2.26 ms, FOV = 24 cm, matrix size = 256 × 256 × 176, slice thickness = 1.0 mm,  
248 voxel size = 1.0 × 1.0 × 1.0 mm, and flip angle (FA) = 9°. The MEMB scan had the following  
249 parameters: TR/TE = 1392/10.6, 24.37, 38.14, 51.91, 65.68 ms (five echoes), FOV = 21.6 cm,  
250 matrix size = 86 × 86 with slice thickness = 2.5 mm (2.5 × 2.5 × 2.5 mm voxel size), 15 slices with  
251 multiband factor = 4 utilized in-plane acceleration (R) = 2 (total slices 60), FA = 90°, and partial  
252 Fourier factor = 0.75. Resting state HDEEG-fMRI scanning lasted for about 30 mins (1810 secs), or

253 1300 dynamic scan timepoints (6500 EPI volumes in total). For this acquisition, the patient was  
254 instructed to close their eyes, but remain relaxed and awake, to refrain from any motion aside from  
255 steady breathing throughout, and not think about anything in particular. Upon completion of  
256 functional scanning, the patient exited from the scanner and photographs verifying HDEEG cap  
257 head-alignment were captured immediately upon cap removal. An additional structural MRI-only  
258 stage, including a repeat of the earlier MPRAGE scan, was performed explicitly without HDEEG  
259 cap.

260

261 MEMB pre-processing and denoising: Three (24.37, 38.14 & 51.91 ms) of the five echoes datasets  
262 were independently processed for exploring BOLD dependence and robustness of potential EZ  
263 components, with each dataset independently registered to the initial cap MPRAGE image with  
264 optimization using boundary-based registration [20]. Respective echo datasets were independently  
265 denoised using a spatial ICA-based strategy for Automatic Removal of Motion Artefacts (ICA-  
266 AROMA) with automatic dimensionality estimation and non-aggressive denoising [13,43]. ICA-  
267 AROMA is an unsupervised data-driven technique based on the FMRIB Software Library (FSL) tool  
268 MELODIC [1] that removes motion-related (bad) components from the data, exploiting a small,  
269 robust set of features for classifiers without training. The denoised fMRI data from each echo were  
270 also separately analysed to assess features from both EEG-naive and EEG-informed BOLD (blood  
271 oxygen level dependent) effects. Candidate EZ regions from remaining components of a  
272 subsequent spatial-ICA of the denoised data were extracted, manually classified applying criteria  
273 adopted from a working paradigm [2]. Independently, the denoised but unsmoothed data was 0.01-  
274 0.1Hz band-passed and transformed to extract static Regional Homogeneity (ReHo) measures  
275 using FATCAT (Functional and Tractographic Connectivity Analysis [49]) software library available  
276 under AFNI (Analysis of Functional NeuroImages) software suite [7]. Dynamic ReHo time-series  
277 were constructed from sequential 20sec sliding windows, prior to decomposing the ICA components  
278 for estimating local connectivity of candidate EZ sources in MRI space.

279

280 Prior to clinical review of IEDs by author (C.P), MRI-gradient and pulse artefact-correction of  
281 HDEEG data were applied consecutively using an average artefact subtraction (AAS) approach with  
282 Curry 9™. A subsequent bandpass Hann-shaped FFT filter from 1 to 40 Hz (slope of 2 Hz, 50%  
283 transmission at 1 Hz; slope of -8 Hz, 50% transmission at 40 Hz) was applied to address cryogenic  
284 pump noise artefacts above this range, when marking event timings of candidate IED peaks, to  
285 generate a set of event regressors for GLM, using FEAT (FMRI Expert Analysis Tool, FMRIB  
286 Software Library [53]). These timings were also applied to compare the models against time-courses  
287 of EEG-naïve BOLD ICA.



## 288 **SEEG**

### 289 **Data acquisition**

290 The target locations for SEEG electrodes were determined based on seizure semiology, the  
291 previous resections' pathology data suggesting focal cortical dysplasia in the right frontal lobe,  
292 video-EEG data, ESI, MSI, and fMRI results. Accordingly, the working hypothesis was right frontal  
293 lobe epilepsy, with insular and temporal lobe sources as alternative EZ candidates, or as part of a  
294 more widespread EZ. Eleven electrodes were implanted on the right and three electrodes on the left  
295 hemisphere to rule out EZ being on the left. See the electrode labels and the area that each contact  
296 records from based on Hammers 95 brain atlas's segmentation [23] in Supplementary Table 1 and  
297 the locations of the electrodes overlaid on the patient's pre-implantation MRI in Figure 1.

298

299 The patient underwent SEEG recording over 5 days, with partial ASM reduction on day 1 and 2, and  
300 reinstatement of usual doses on day 3. A total of 9 habitual seizures were recorded during the 5-day  
301 SEEG monitoring, all similar electro-clinically. These were spread throughout the recording period,  
302 with 1-2 spontaneous seizures occurring each day of recording from day 1- day 5.

303

304 The SEEG data was collected using a Nihon-Kohden EEG system, which recorded the signals at a  
305 sampling frequency of 1000 Hz in the frequency range above 0.08 Hz. Bad channels were excluded  
306 from analyses based on visual inspection. No other pre-processing analyses were performed on the  
307 data. The interictal data were epoched to include four 30-minute recordings, two on the 1<sup>st</sup> day (>24  
308 hours post anaesthesia) and two on the 4<sup>th</sup> day of implantation in wake and sleep stages,  
309 respectively, at least 2 hours from any seizure. The reason for using 30 minutes of recording was a  
310 matter of practicality to ensure that the epoch was long enough to provide enough interictal spiking  
311 for analysis but not too long so that the patient's mental and physical status would drastically  
312 change within the epoch. We chose to analyse both wake and sleep interictal states because of the  
313 known effect of sleep on interictal spike rate and electrical field [17]. We chose days 1 and 4 to  
314 evaluate both early and later stages of monitoring in the analysis. The ictal data was epoched from -

315 30 to +30 seconds relative to the onset of each of the 9 recorded seizures determined visually by  
316 the initiation of electrographic seizure activity.

## 317 Interictal analyses

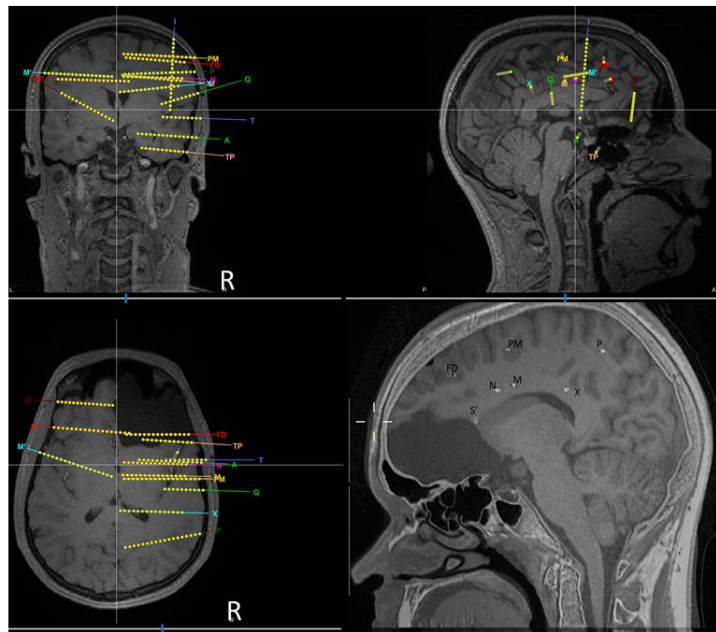

**Figure 1.** Reconstructed electrode and contact locations overlaid on the patient's preimplantation MRI (top and left bottom panels). Right bottom panel shows the fused pre-implantation MRI and post-implantation CT to indicate the location of tip of the electrodes inserted through the right hemisphere and the S' electrode inserted through the left hemisphere.

318 We detected spikes across all channels using an automatic spike detector in wake and sleep stages  
319 to localise the irritative zone. The automated spike detection algorithm detected HFOs (80-250 Hz)  
320 that co-occurred with interictal epileptiform spikes [6], which has been shown to be a more robust  
321 indicator of epileptogenic tissue compared to the detection of spikes alone [44]. The algorithm was  
322 run on the four 30-min time windows of the interictal recording – two on day 1 (wake and sleep) and  
323 two on day 4 (wake and sleep). The algorithm needed the user's confirmation on every individual  
324 detected spike. To avoid subjective inputs, we accepted all the interictal spikes detected by the  
325 automatic detector upon making sure that they looked genuine and free of artefact.

326

327 Our second interictal analysis identified potential regions of spike initiation before propagation based  
328 on interictal spike co-occurrence and temporal progression across the SEEG contacts [24].

329 Specifically, we first selected four contacts in which we observed the maximum number of spikes  
330 and then checked the time delay between their co-occurring spikes (i.e., those which occurred within  
331 1 s time delay from each other across contact pairs), to track potential spike propagation across the  
332 brain. The time of spike onsets were used in analyses. This method aligns with recent studies which

333 used spike timing to localise the EZ [11,47].

### 334 **Ictal analyses**

335 We first generated a cortical “epileptogenicity map” of the potential seizure onset zone which  
336 quantifies the level of fast activity during seizures across areas sampled with electrode contacts  
337 (SOZ) [8]. Using the “Epileptogenicity Map” function on Brainstorm software (Version: 3.231027), we  
338 quantified the level of increase in fast activity (between 60 to 200 Hz) from the time window  
339 immediately before (-20s to 0s) to after seizure onset (0s to 20s) in all SEEG contacts using a  
340 statistical parametric mapping procedure implemented in Brainstorm. Accordingly, the level of power  
341 in the high-frequency band was quantified over 2s-long sliding time windows (no overlap). This gave  
342 us topographic maps on the brain surface indicating how much increase in the fast activity each  
343 area experienced upon seizure onset as quantified by  $t$  value.

344

345 Second, to track the potential flow of epileptogenic activities across the brain we used a simplified  
346 version of Granger-based connectivity analysis which has successfully tracked signals across the  
347 brain [27]. Here, we included the whole signal without filtering or feature extraction (i.e., broadband)  
348 which included slow shifting signals as well as fast activity (Figure 3B). Specifically, we used a  
349 partial correlation metric to evaluate the contribution of activity from one area to another:

350

$$351 \quad X \text{ to } Y = \rho_{X(t-T)Y(t).Y(t-T)} \quad (1)$$

352

353 where  $\rho_{X(t-T)Y(t).Y(t-T)}$  indicates the correlation between past activity on contact  $X$  to present  
354 activity on contact  $Y$ , while partialling out the influence of past activity on contact  $Y$ .  $X(t)$  and  $Y(t)$   
355 are activities at time  $t$  in areas  $X$  and  $Y$ , respectively, and  $T$  is the time/sample delay considered  
356 between two areas (here  $T = 100ms$ ). In our implementation of the method the signals from two  
357 areas along a 1s window ( $t = t_0, \dots, t_0 - 1000ms$ ) were used for calculating the correlation (i.e., 200  
358 signal samples were used across pairs of areas). As the partial correlation equation in (1) was  
359 asymmetric, we also calculated the opposite flow to quantify the flow from  $Y$  to  $X$  contacts and then  
360 reported their difference as the dominant flow of information across pairs of contacts. We calculated  
361 the signal flow on every 5<sup>th</sup> sample (5ms sampling period) along the pre to post seizure onset  
362 window (-10 to 10s). This gave us a time-resolved connectivity measure quantifying the flow of  
363 signal across the sampled areas upon seizure onset. For this analysis, we used the same SEEG  
364 contacts that were found to produce the maximum number of spikes interictally, which also  
365 overlapped with the contacts that showed the largest increase in fast activity upon seizure onset.  
366 We set the inter-contact delay ( $T$ ) to 100ms consistently across all analysed contacts as this gave  
367 us the highest partial correlations on average across all pairs of analysed contacts. It is of note that,  
368 as opposed to conventional connectivity analyses, where the connectivity between all contacts are

369 evaluated, we only analysed connectivity between pairs of four contacts targeting the right anterior  
370 (N) and posterior (X) cingulate, right amygdala (A) and right mesiotemporal pole (TP), which  
371 produced the maximal spiking in the interictal period.

372

### 373 **Statistical analyses**

374 The significance of epileptogenicity maps were evaluated in Brainstorm software using statistical  
375 parameter mapping at a threshold of  $\alpha = 0.01$  and corrected for false discovery ratio for multiple  
376 comparisons across time, electrode contacts and frequencies. This resulted in t-values. t-values  
377 above 1.96 are generally considered to indicate a significant effect (meaning increase in fast activity  
378 power from baseline in this work).

379

380 As in our previous work [29], we used a Bayes Factor analysis for statistical inference of signal flow  
381 upon seizure onset [45]. We used standard rules of thumb for interpreting levels of evidence [12,37]:  
382 Bayes factors above 6 and below 1/6 were interpreted as evidence for the alternative and null  
383 hypotheses, respectively. We considered the Bayes factors which fell between 1/6 and 6 as  
384 insufficient evidence either way.

385

386 To evaluate the evidence for the null and alternative hypotheses of at-chance and above-chance  
387 signal flow, respectively, we compared the signal flow on every time point and the signal flow  
388 obtained from the null distribution. To obtain the null distribution of signal flows, we shuffled the  
389 samples of signal  $X$  a thousand times and calculated the signal flow from  $X$  to  $Y$  and reverse,  
390 calculated the null signal flow and compared it against the true signal flow. For that, we performed  
391 an unpaired Bayes factor t-test for alternative (i.e., difference from chance; H1) and the null (i.e., no  
392 difference from chance; H0) hypotheses.

393

394 To evaluate the evidence for the null and alternative hypotheses of non-different and different from  
395 zero inter-area delay, respectively, we compared the true inter-area delay vector with a vector of the  
396 same size but only including zero values.

397

398 The priors for all Bayes factor analyses were determined based on Jeffrey-Zellner-Siow priors  
399 [25,54] which are from the Cauchy distribution based on the effect size that is initially calculated in  
400 the algorithm using t-test [45].

### 401 **Data availability**

402 Images showing seizure semiology are available upon request to the authors.

## 403 **Results**

### 404 **HDEEG, MEG, fMRI**

405 No ictal activity was recorded during the non-invasive recording session (HDEEG alone, HDEEG-  
406 MEG, HDEEG-fMRI). Interictal ESI results were, however, consistent across the three sequential  
407 acquisition sessions with the early phase source activity identifying a candidate generator at the  
408 right anterior frontal lobe, adjacent to the supero-medial resection margin (Figure 2A). MSI  
409 localisation was stable at all discharge phases at the right anterior cingulate cortex but was infero-  
410 medial to the early-phase ESI localisation (Figure 2B).

411  
412 Routine ICA modelling of denoised fMRI data highlighted BOLD results that were consistent with  
413 both the ESI and MSI early onsets, as well as delineating a broader region of the right cingulate  
414 cortex that extended posteriorly to the mid-cingulate cortical boundary. With two subregions showing  
415 stronger activation hotspots from ICA. Further exploration from the ReHo analysis more clearly  
416 identified local connectivity strength of activation, consistent with the ESI and MSI results but  
417 uncovering a prominent activation posteriorly along the line of the anterior cingulate towards the  
418 right mid-cingulate junction (Figure 2C). Details of additional fMRI analyses including EEG-informed  
419 GLM analysis and EEG-naïve Independent Component Analysis are presented in Supplementary  
420 Figure 1.

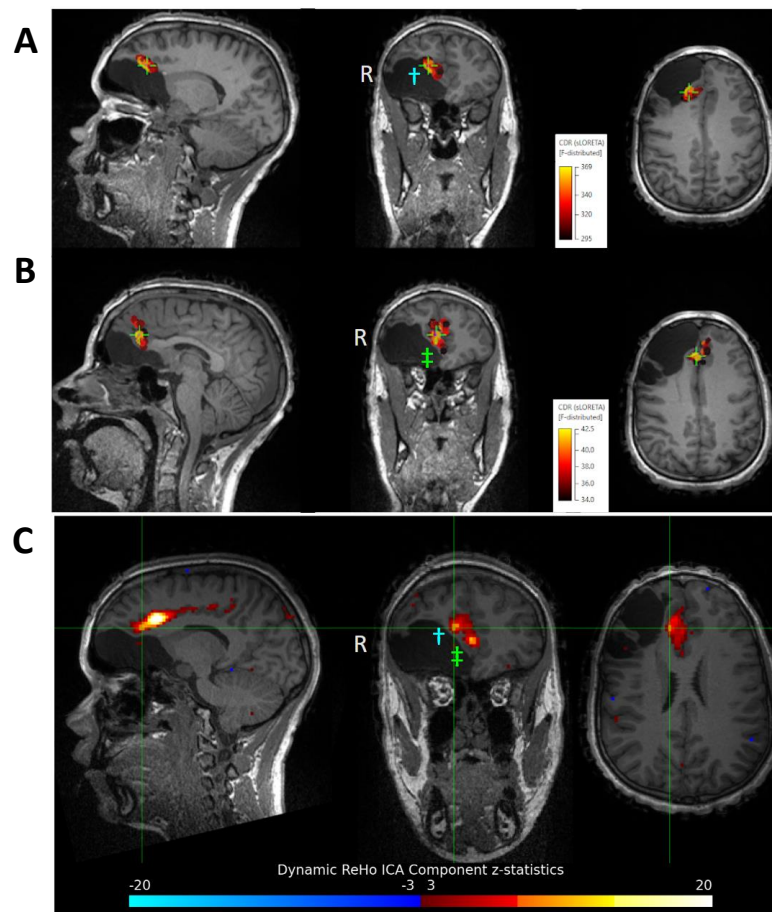

**Figure 2.** Key non-invasive multimodal imaging results for early phase ESI (A), early phase MSI (B) and ReHo fMRI (C). ESI and MSI solutions were based on averaged interictal discharges carrying the highest SNR values (n=12) during the HDEEG-MEG co-acquisition. ESI and MSI solutions sit at the posterior margin of the prior resection at the right frontal lobe, with MSI inferomedial to the ESI current density result. Note that the broader ReHo fMRI solution co-localises to both ESI and MSI solutions at its anterior extent (ESI co-localisation single dagger blue, MSI co-localisation double dagger green), while its posterior extent involves the anterior cingulate and mid-cingulate junction. Based on the superior temporal resolution of ESI and MSI over fMRI, we hypothesised that the primary EZ generator involved the anterior-most region of the right anterior cingulate while the posterior-most anterior cingulate and middle cingulate regions, which were also incriminated by ReHo fMRI, were more likely expressions of recruited or propagated activity. ESI results were internally consistent across recording sessions (HDEEG alone, HDEEG-MEG, and HDEEG-fMRI).

421

## 422 SEEG

423 Sample recordings from the interictal and ictal time windows are shown in Figure 3. The patient had  
424 consistent and stereotyped patterns of interictal activities over time with increases in the prevalence  
425 of spikes in right anterior cingulate area (initial contacts of N) from day 1 to day 5 with decreasing  
426 ASMs. We also observed very consistent patterns of ictal activity as reflected in slow-wave shifts  
427 and low-voltage fast activity starting in right anterior cingulate area followed by other areas.

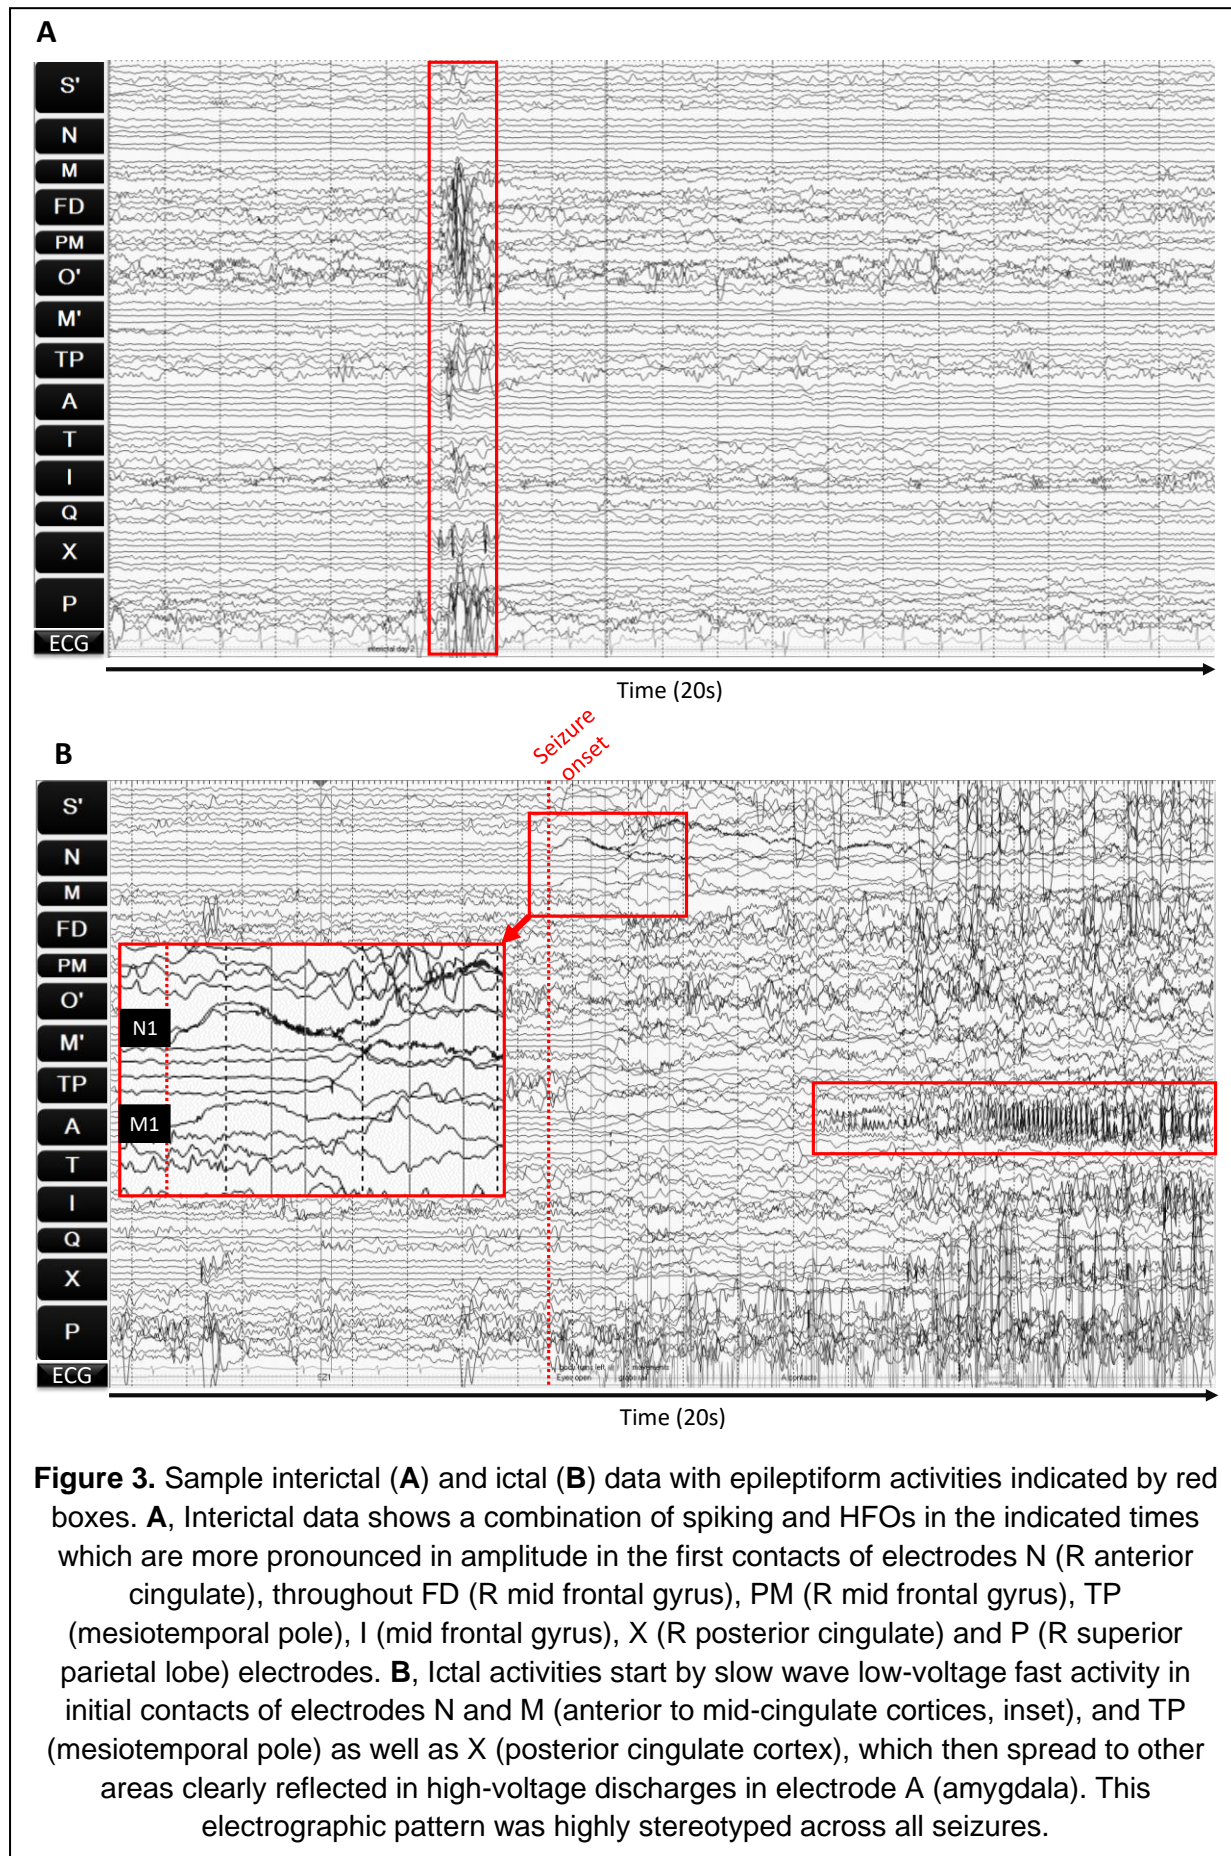

429 **Interictal analysis**

430 Interictal spike detection showed that spikes were most prevalent in right anterior (N) and posterior  
 431 (X) cingulate, right amygdala (A) and right mesiotemporal pole (TP) (Figure 4A). All the mentioned  
 432 areas produced the maximum number of spikes on day 1 and 5 except that right anterior cingulate  
 433 ranked a top spiking site on the last day of recording when the number of seizures were also  
 434 maximal (Supplementary Figure 2). This introduced a brain-wide structure as the irritative network  
 435 involving cingulate and mesiotemporal structures.  
 436

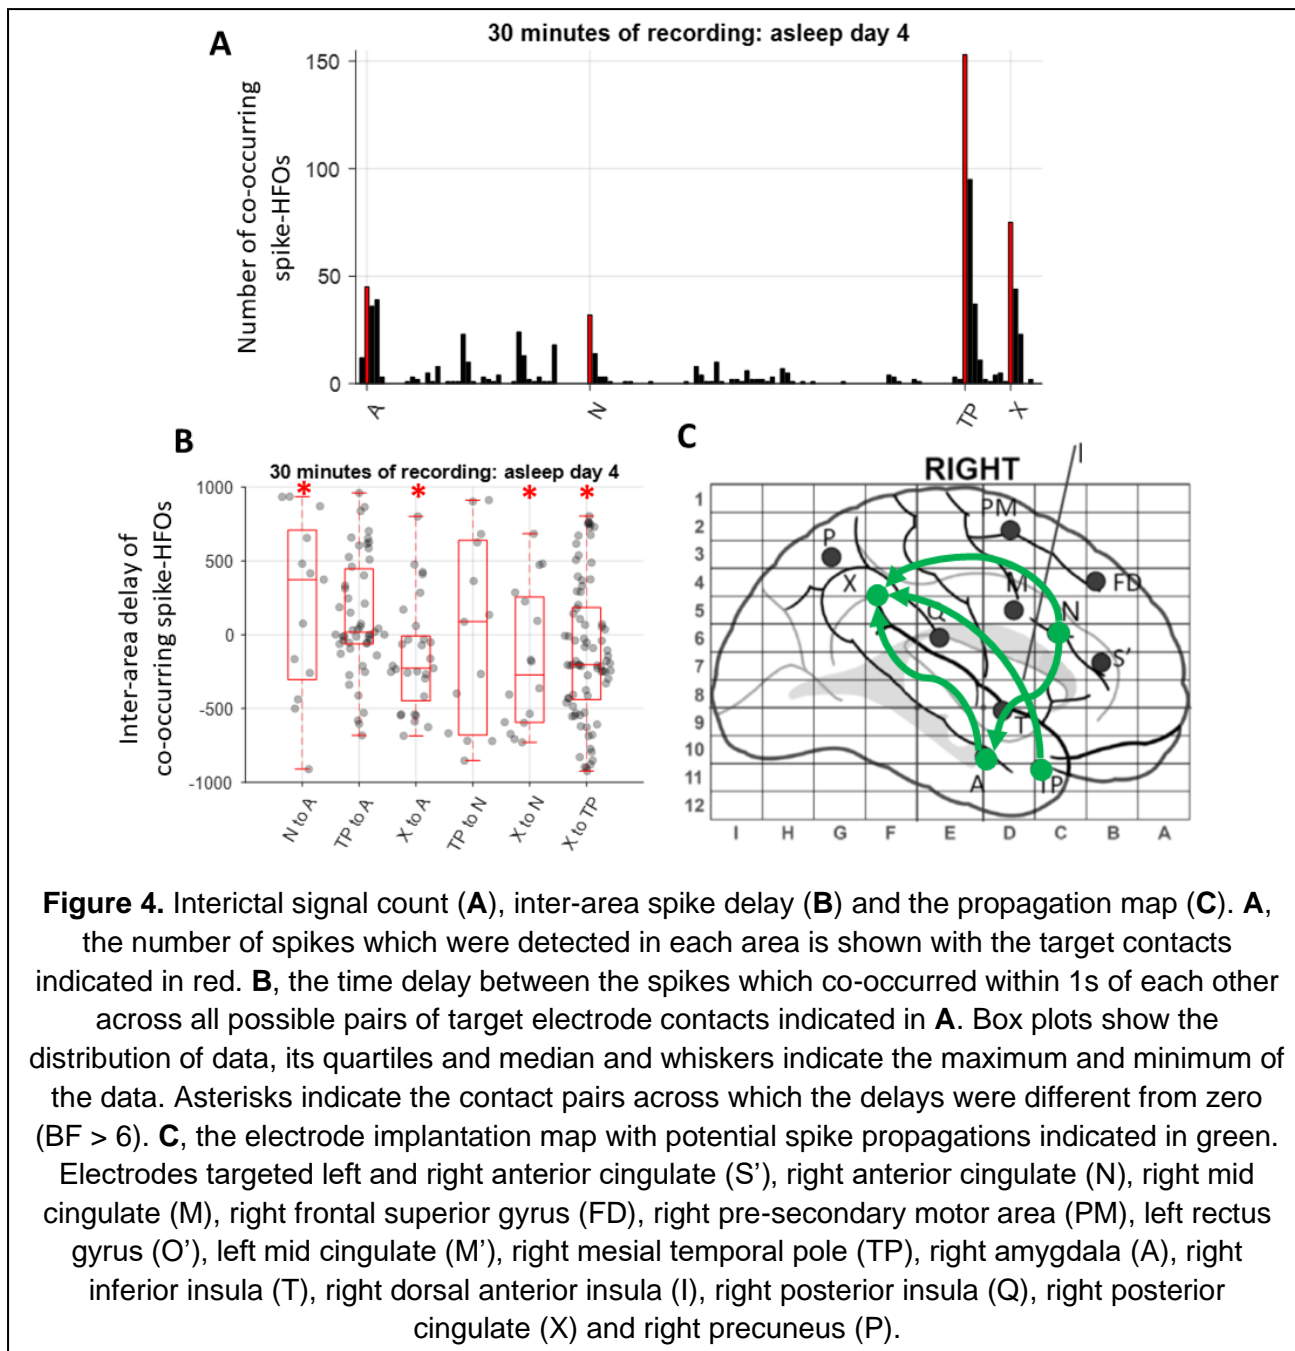

**Figure 4.** Interictal signal count (**A**), inter-area spike delay (**B**) and the propagation map (**C**). **A**, the number of spikes which were detected in each area is shown with the target contacts indicated in red. **B**, the time delay between the spikes which co-occurred within 1s of each other across all possible pairs of target electrode contacts indicated in **A**. Box plots show the distribution of data, its quartiles and median and whiskers indicate the maximum and minimum of the data. Asterisks indicate the contact pairs across which the delays were different from zero (BF > 6). **C**, the electrode implantation map with potential spike propagations indicated in green. Electrodes targeted left and right anterior cingulate (S'), right anterior cingulate (N), right mid cingulate (M), right frontal superior gyrus (FD), right pre-secondary motor area (PM), left rectus gyrus (O'), left mid cingulate (M'), right mesial temporal pole (TP), right amygdala (A), right inferior insula (T), right dorsal anterior insula (I), right posterior insula (Q), right posterior cingulate (X) and right precuneus (P).

437

438 In order to check the potential propagation of spikes between those areas, we extracted the time of



439 spike across the four contacts. The time delays between all co-occurring spikes across all possible  
440 pairs of these brain areas are plotted in Figure 4B. Results showed that spikes predominantly  
441 appeared earlier in right anterior cingulate than the right amygdala and right posterior cingulate and  
442 they appeared earlier in right temporal pole and amygdala than the posterior cingulate (asterisks  
443 indicate the contacts across which the delay was different from zero;  $BF > 6$ ). This suggests that  
444 spikes seem to predominantly initiate in the right anterior cingulate and propagate to right mesial  
445 temporal pole, amygdala and the posterior cingulate (Figure 4C).

#### 446 Ictal analysis

447 We obtained epileptogenicity maps over time which quantified the relative increase in the power of  
448 fast activity (between 60 to 200 Hz) upon seizure onset across the brain areas sampled by  
449 implanted electrodes (Figure 5). These results represent the average of the 9 seizures. We  
450 observed that, upon seizure onset (1-3s relative to onset), right anterior and mid cingulate areas  
451 (including N and M electrode contacts), showed the highest increase in the power of fast activity.  
452 This was followed (3-5s) by many other areas including right and left dorsolateral, temporal, and  
453 parietal cortices.

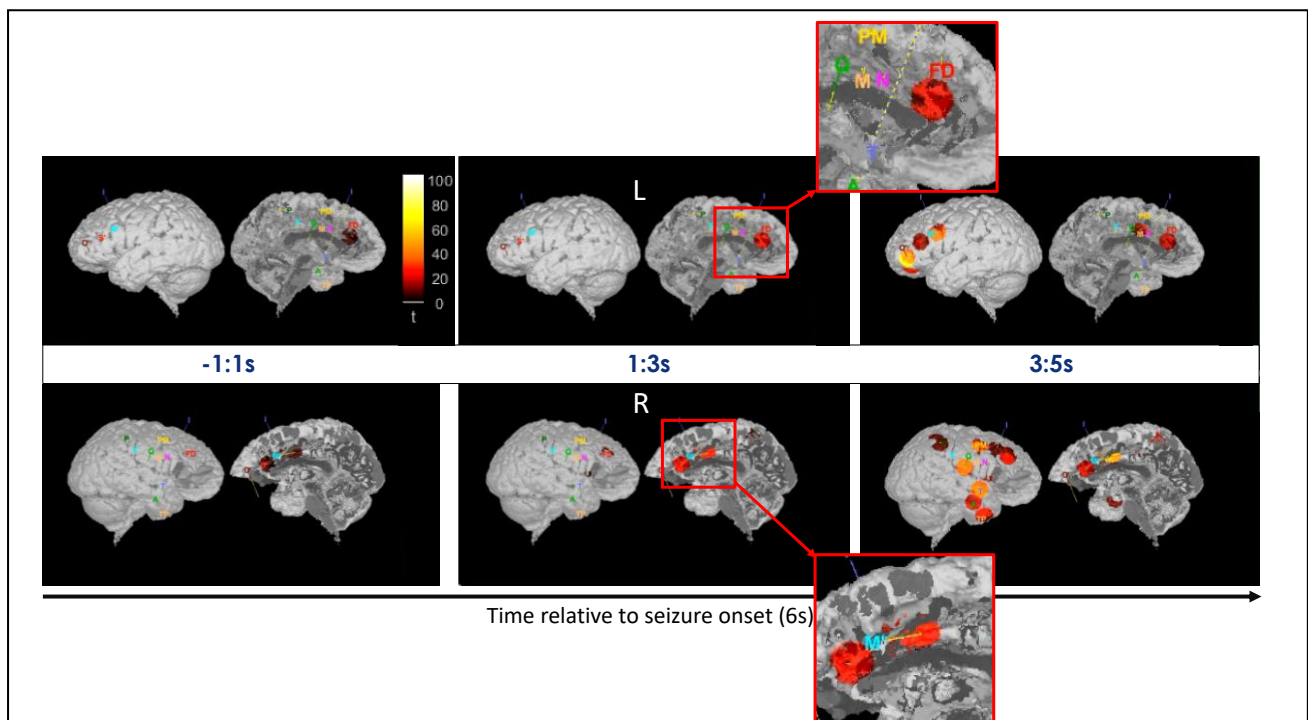

**Figure 5.** Epileptogenicity maps indicating the level of increase in fast activity (60-200 Hz) across the brain in 2s sliding time windows relative to the baseline before seizure onset (-20 to 0s). Brighter colours indicate higher increase in the power of fast activity suggesting that right anterior to mid cingulate cortices were the first areas to show the increase in high-frequency power (middle column). The area of the activity around each electrode contact is fixed, and the colour changes with the level of increase in fast activity. L: left hemisphere; R: right hemisphere.

454

455 The epileptogenicity maps suggest that the fast activity started from the anterior mid-cingulate area  
456 and propagated to involve other areas, notably mesial temporal, insular, lateral frontal and posterior  
457 cortex. To quantify how the seizure activity flowed across the brain we applied a Granger-based  
458 connectivity analysis and tracked the signals between right anterior and posterior cingulate, right  
459 amygdala and right temporal pole. These areas were indicated by the interictal spiking activity and  
460 also showed the highest increase in fast activity upon seizure onset. It is of note that, as opposed to  
461 the epileptogenicity map analysis, here we included the broad-band signals rather than the fast  
462 activity only. Around the seizure onset time (-1 to +2s) there was strong evidence (Bayes Factor > 6)  
463 for flow of signals from right anterior cingulate cortex to the right mesial temporal pole (Figure 6A).  
464 There were also time points with strong evidence (BF > 6) for signals flowing from the right  
465 amygdala to right mesial temporal pole. There were also sporadic time points with strong evidence  
466 (BF > 6) for signals flowing from right anterior to posterior cingulate cortices. These results are  
467 summarised in the graphical panel in Figure 6B. Together, the connectivity results of ictal data  
468 suggested that the seizure signals initiated in right anterior mid-cingulate areas and then propagated  
469 to the right posterior cingulate and mesial temporal areas.  
470

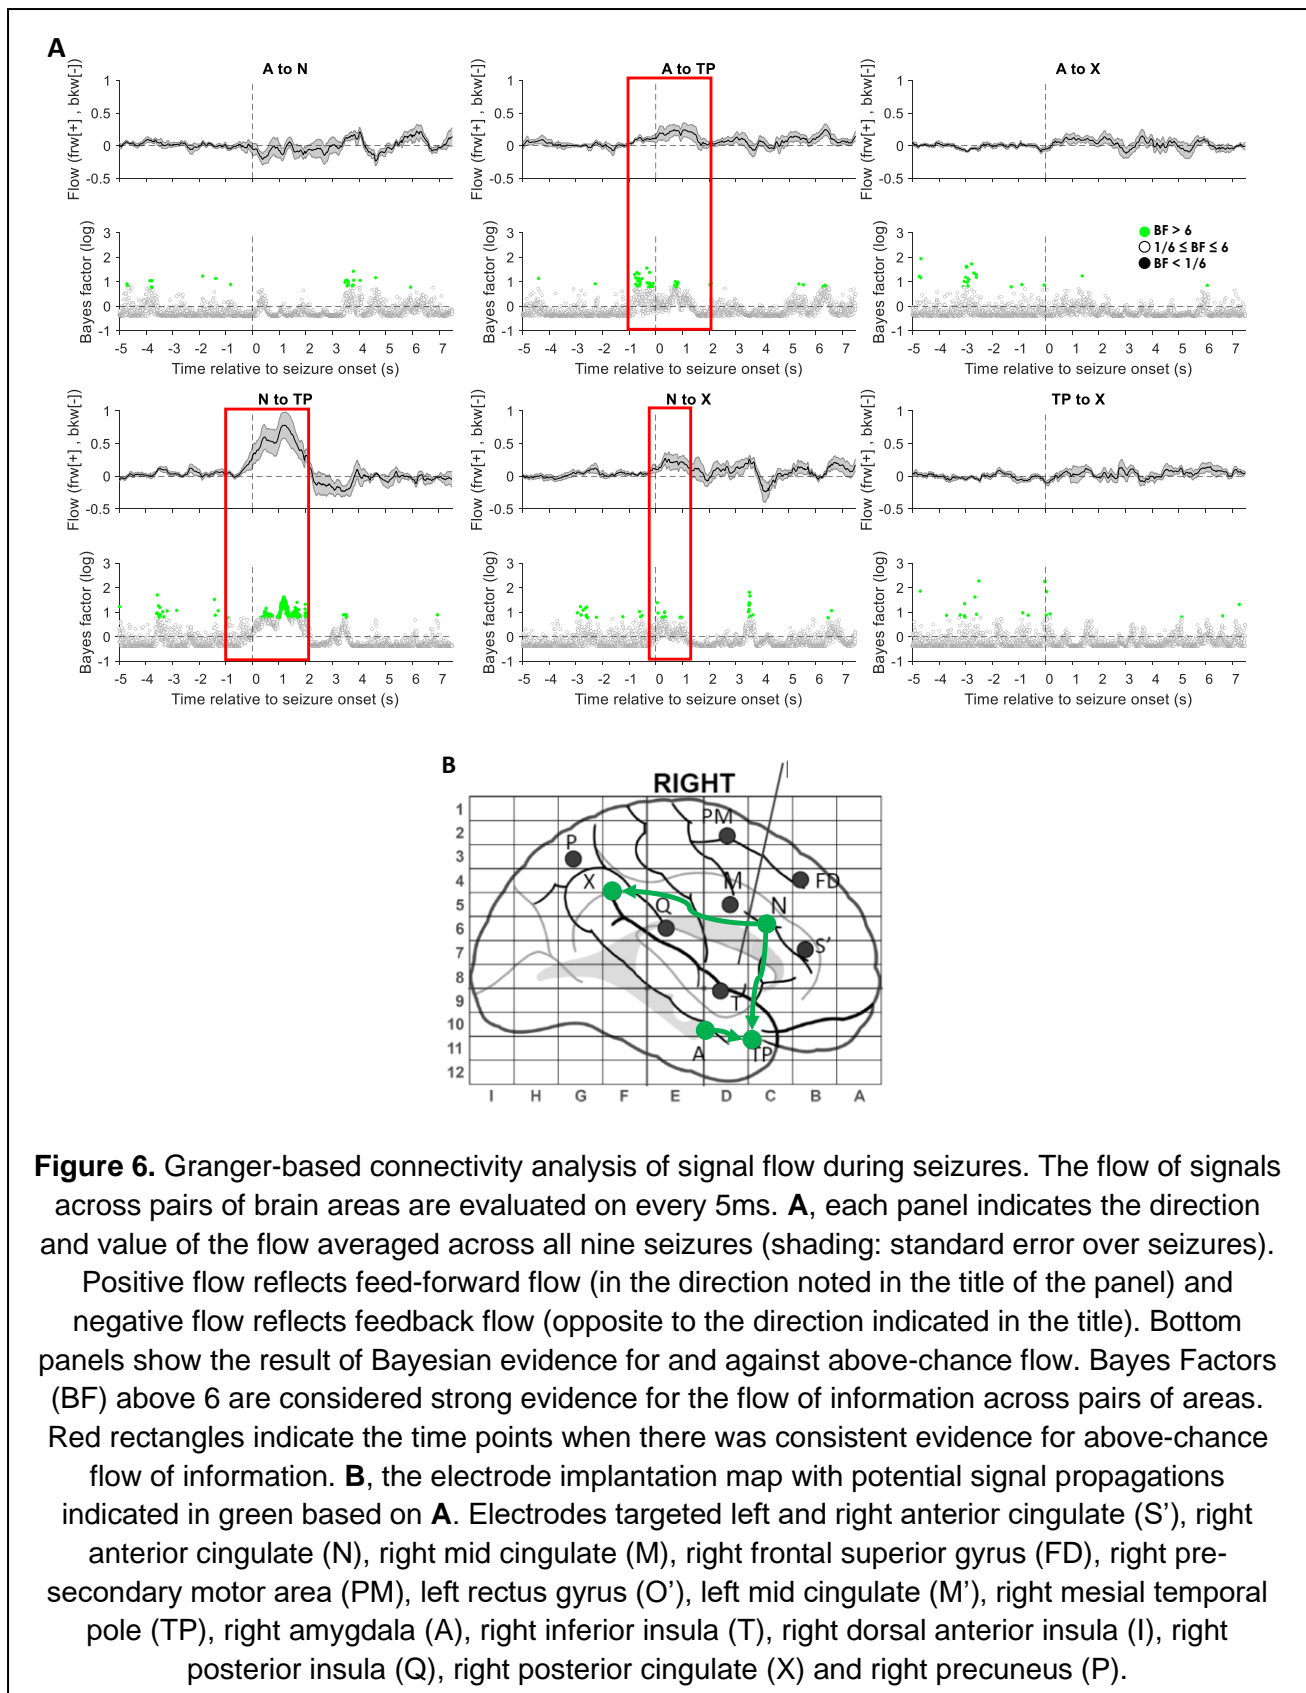

## 472 **Discussion**

473 We performed a multi-modal analysis to localise the EZ in a patient with hyperkinetic seizures due to  
474 MRI-negative, focal, drug-resistant epilepsy. This case was challenging clinically because of  
475 complex semiology, no evident MRI epileptogenic lesion and persistent frequent disabling  
476 hyperkinetic seizures despite two previous right frontal resections, one of which had shown  
477 evidence of FCD type 2A. As such, the decision to pursue further presurgical investigation required  
478 careful analyses of non-invasive data in order to refine hypotheses to be tested using SEEG, thus  
479 shaping implantation strategy, in a setting where standard clinical data alone did not allow for  
480 sufficiently detailed hypotheses to be formulated, notably because of complex semiology and  
481 absence of MRI lesion (apart from prior surgical cavity). The ensemble of non-invasive results  
482 helped to reinforce that the right frontal lobe, and in particular right mesial frontal regions, showed  
483 most abnormalities. Our novel signal analyses applied to a combination of HDEEG, MEG, fMRI and  
484 SEEG datasets provided concordant results indicating that the primary EZ was most likely in the  
485 right prefrontal region, maximally centred upon the right anterior and mid-cingulate area.

486

487 The multi-modally concordant results of this study not only provided evidence for the value of  
488 multimodal analysis in localisation of EZ, but we also introduced several novel quantitative  
489 approaches for EZ localisation.

490

## 491 **HDEEG, MEG, fMRI**

492 Our novel single session, sequential HDEEG-MEG and HDEEG-fMRI recordings and results  
493 demonstrate consistent inter-modality localisation of the putative EZ to the region of the right  
494 anterior cingulate gyrus. This information was critical in guiding the placement of the SEEG  
495 electrodes, which subsequently validated our non-invasively acquired findings. These results are  
496 also in line with our previous work that demonstrates the importance of looking at earlier phase  
497 components closer to the region of take-off for the source analysis of interictal (and ictal) discharges  
498 (as opposed to limiting ESI and MSI to the later mid-upswing and peak components) [4,42].

499 Contemporary source imaging approaches still tend to focus on these later time-points for EZ  
500 mapping despite the risk that the solutions, while carrying higher SNR values, are more likely to be  
501 contaminated by the effects of extensive cortical recruitment and propagation [51]. The rapidity with  
502 which cortical propagation can occur for interictal events, which is less well appreciated than for ictal  
503 events, is clearly evidenced by the subsequent SEEG findings in this patient. Although the HDEEG-  
504 MEG and HDEEG-fMRI recordings did not capture ictal activity in our patient, our previous work has  
505 highlighted the commonality of ictal and interictal patterns of signal origin and propagation when the  
506 whole epoch from discharge onset to peak is submitted to source imaging [42]. This observation

507 finds further support in the follow-on SEEG interictal and ictal analyses, which both strongly  
508 implicated a common generator in the region of the right anterior cingulate cortex.

509

510 The central finding of the EEG-informed GLM models highlighted a stronger frontal correlation with  
511 BOLD activations, however the EEG-naïve ICA approaches uncovered consistent broader cingulate  
512 involvement extending posteriorly to the mid-cingulate region. The transformation of the fMRI data  
513 into dynamic measures of regional homogeneity (local connectivity) clarified the spatial relationships  
514 of activated cortex that included those identified by ESI and MSI. The power of the multimodal  
515 acquisitions enabled us to cross validate features identified independently using different  
516 parameters to confirm spatial concordance of solutions from both EEG-naïve and EEG-informed  
517 models.

518

519 Taken together, the ESI, MSI, and fMRI results suggested that either a complex source or complex  
520 multi-nodal network was responsible for interictal source generation. The benefits of the spatial  
521 resolution offered by fMRI remained hampered by the slower haemodynamic response relative to  
522 the higher EEG and MEG temporal resolutions. While this does limit our ESI-MSI to fMRI cross  
523 modality interpretation in discriminating whether a generator is uniformly distributed or focal, the  
524 extent of the activated cortical regions provided a clearer hypothesis for SEEG exploration. Our  
525 complementary non-invasive modalities suggested that the primary EZ generator localised to the  
526 right anterior frontal regions at the posterior resection margin and anterior cingulate (as indicated by  
527 the early phase ESI and MSI) before recruitment of the posterior-aspect of the right anterior  
528 cingulate and mid-cingulate areas (as indicated by the fMRI features).

## 529 **SEEG**

530 Our spike delay analysis in SEEG is novel and builds on the recent studies which looked at the  
531 timing of spikes across recording contacts to localise the EZ [11,47]. Specifically, one study  
532 investigated the fine-grained timing and direction of interictal and ictal discharges using  
533 microelectrode grids and showed that interictal discharges are travelling waves that traverse the  
534 same path as seizure discharges [47]. After confirming a consistent temporal ordering of discharges  
535 in interictal and ictal windows, another study developed a novel source localisation method based  
536 on wave propagation, which successfully localised the EZ [11]. Our spike delay analysis builds on  
537 these previous studies and shows that the direction of spike propagation in the interictal period is  
538 consistent with the flow of broad-band signals in the ictal period (i.e., both appearing first in the  
539 anterior cingulate cortices). The generalisation of interictal spikes to broad-band ictal power is  
540 important because the seizure activity generally consists of spatiotemporally complex broad-band  
541 activities rather than only ictal spiking, albeit with evidence that the key fast activity at seizure onset  
542 is typically narrow gamma band, as evidenced in Chauvel and colleagues' "fingerprint" analyses [21]

543 and also highlighted in recent work [10]. The separation of ictal spikes from non-spike activity  
544 imposes difficulties for analysis and may always involve some subjective decisions on labelling of  
545 spikes.

546

547 Importantly, both interictal spiking and ictal seizure patterns in SEEG showed an outward  
548 propagation from the anterior cingulate area, which we considered to be the EZ core, and  
549 propagated to the secondary involved areas (referred to as propagation zone previously [35]. While  
550 these results are intuitive, the full characterisation of the relationships between the epileptogenic  
551 patterns in the two time windows need further research as the literature is not fully consistent. On  
552 one hand, we have recently shown that some global features of neural activities, such as beta-band  
553 power and gamma-band inter-channel coherence (a measure of connectivity), can have localising  
554 power in both interictal and ictal periods [32]. To test the generalisability of patterns over time we  
555 trained the classifiers using the data from one time window (e.g., interictal) and tested them to  
556 localise the EZ in the other time window (e.g., ictal) and found the same features to be informative  
557 and provide above-chance localisation performance. On the other hand, there are studies which  
558 have shown that while the signals flow towards the seizure onset zone in the interictal period,  
559 consistent with the source-sink theory of EZ [22], the direction is dominantly opposite in the ictal  
560 period, suggesting distinct patterns of signal flow in the two windows [26]. This seems at odds with  
561 our results and those reviewed above showing the consistent direction of spikes and broad-band  
562 signals in the interictal and ictal periods, respectively.

563

564 This discrepancy can be explained by the fact that these studies have used distinct features of  
565 neural activity (e.g., spikes vs. broad-band signal) and distinct measures of directed connectivity  
566 (e.g., spike timing vs. coherence) each of which may affect the results. Future studies that evaluate  
567 multiple features of signals in isolation [28] or combination [31] along with more rigorous connectivity  
568 methods [30] on the same dataset may provide a more comprehensive insight into the dominant  
569 direction and consistency of signal flow in interictal and ictal periods and whether that can localise  
570 the EZ.

571

572 These analyses complement and go beyond the clinician's standard visual analysis, not only by  
573 quantifying signals related to interictal and ictal pathophysiologic activity, but also indicating their  
574 directionality, which helps to reinforce the separation of EZ from propagation zones. This is a  
575 particularly challenging aspect in frontal lobe seizures explored on SEEG due to their known  
576 propensity for rapid and widespread propagation related to intrinsic properties of frontal lobe  
577 connectivity [3]. In the present case these analyses helped to confirm for example that, while the  
578 extra-frontal inter-ictal spikes were overall more abundant than the mesial frontal spikes, the  
579 temporal relation of their occurrence was in favour of a primary role of the anterior mid-cingulate

580 region (i.e., same region as maximal seizure onset fast activity). Likewise, the seizure onset  
581 analyses of directionality of gamma band activity helped to show an antero-posterior spread in the  
582 cingulate that was maximal at a distance from the previous resection margin. This helped to define  
583 surgical strategy in a way that would not have been possible using for example intraoperative  
584 electrocorticography at the previous resection margin.

## 585 **Limitation**

586 We recognise that the main limitation of this work is that it has been presented here as a single case  
587 report. While the application of the proposed methods to additional patients is needed to establish  
588 their generalisability, the main contributions of this work are twofold. Our approach helps qualify  
589 preoperative targets non-invasively and provides more confidence in the use of SEEG in  
590 characterising and validating markers of complex extended epileptogenic networks leading to more  
591 successful surgical outcomes. This method presents a natural augmentation and paradigm-shift  
592 from the original solid SEEG investigation to a multi-modal approach by leveraging more recent  
593 technological advancements to broaden both temporal and spatial resolutions (and biomarker  
594 dimensions).

## 595 **Conclusion**

596  
597 Multi-modal HDEEG-MEG-fMRI non-invasive data analyses can optimise patient selection for SEEG  
598 and can help to guide SEEG implantation strategy and surgical decision-making in complex cases.  
599 The recording of brain activity across these three modalities within a single session (when the  
600 patient is more likely to be in the same "brain-state") can also be achieved, allowing ESI, MSI, and  
601 fMRI results to more fully characterise the extent of the EZ. Invasive quantitative analyses  
602 demonstrated overlap with our combined non-invasive findings, lending confidence to our  
603 hypothesis for the likely EZ and opening the way for a more definitive surgical solution for our  
604 patient. As non-invasive multi-modal investigation paradigms are validated by SEEG localisation of  
605 EZ and satisfactory surgical outcomes, it may become possible to rely more on non-invasive  
606 investigations for cerebral localisation in selected cases. Larger case series with robust comparison  
607 of multi-modal data in different clinical sub-groups will be necessary to better understand the  
608 predictive value of these investigations.

## 609 **Acknowledgements**

610 We would like to thank all members of the Mater Epilepsy team, Brisbane including Dr Jason  
611 Papacostas, Neurosurgeon. We thank Prof Simon Harvey's team (Royal Children's Hospital,  
612 Melbourne) and Prof Patrick Chauvel (Cleveland Clinic Foundation) for helpful clinical case

613 discussions. We thank Mater Foundation and Mater Research Institute for supporting this study. We  
614 would also like to acknowledge the facilities and scientific and technical assistance of the National  
615 Imaging Facility, a National Collaborative Research Infrastructure Strategy (NCRIS) capability, at  
616 the Swinburne Neuroimaging Facility, Swinburne University of Technology.

## 617 **References**

- 618 [1] Beckmann CF, Smith SM. Probabilistic independent component analysis for functional  
619 magnetic resonance imaging. *IEEE Trans Med Imag* 2004;23(2):137-52.
- 620 [2] Boerwinkle VL, Wilfong AA, Curry DJ. Resting-state functional connectivity by independent  
621 component analysis-based markers corresponds to areas of initial seizure propagation established  
622 by prior modalities from the hypothalamus. *Brain Connect* 2016;6(8):642-51.
- 623 [3] Bonini F, McGonigal A, Trébuchon A, Gavaret M, Bartolomei F, Giusiano B, et al. Frontal  
624 lobe seizures: from clinical semiology to localization. *Epilepsia* 2014;55(2):264-77.
- 625 [4] Cao M, Galvis D, Vogrin SJ, Woods WP, Vogrin S, Wang F, et al. Virtual intracranial EEG  
626 signals reconstructed from MEG with potential for epilepsy surgery. *Nat Commun* 2022;13(1):994.
- 627 [5] Cao M, Vogrin SJ, Peterson AD, Woods W, Cook MJ, Plummer C. Dynamical network  
628 models from EEG and MEG for epilepsy surgery—a quantitative approach. *Front Neurol*  
629 2022;13:837893.
- 630 [6] Chu CJ, Chan A, Song D, Staley KJ, Stufflebeam SM, Kramer MA. A semi-automated  
631 method for rapid detection of ripple events on interictal voltage discharges in the scalp  
632 electroencephalogram. *J Neurosci Meth* 2017;277:46-55.
- 633 [7] Cox RW. AFNI: software for analysis and visualization of functional magnetic resonance  
634 neuroimages. *Comput Biomed Res* 1996;29(3):162-73.
- 635 [8] David O, Blauwblomme T, Job AS, Chabardès S, Hoffmann D, Minotti L, et al. Imaging the  
636 seizure onset zone with stereo-electroencephalography. *Brain* 2011;134(10):2898-911.
- 637 [9] De Curtis M, Avanzini G. Interictal spikes in focal epileptogenesis. *Prog Neurobiol*  
638 2001;1;63(5):541-67.
- 639 [10] Di Giacomo R, Burini A, Chiarello D, Pelliccia V, Deleo F, Garbelli R, et al. Ictal fast activity  
640 chirps as markers of the epileptogenic zone. *Epilepsia* 2024;65(6):e97-103.
- 641 [11] Diamond JM, Withers CP, Chapeton JI, Rahman S, Inati SK, Zaghloul KA. Interictal  
642 discharges in the human brain are travelling waves arising from an epileptogenic source. *Brain*  
643 2023;146(5):1903-15.
- 644 [12] Dienes Z. Using Bayes to get the most out of non-significant results. *Front Psych*  
645 2014;5:781.
- 646 [13] Dipasquale O, Sethi A, Laganà MM, Baglio F, Baselli G, Kundu P, Harrison NA, Cercignani  
647 M. Comparing resting state fMRI de-noising approaches using multi-and single-echo acquisitions.



- 648 PloS One 2017;12(3):e0173289.
- 649 [14] Fiest KM, Sauro KM, Wiebe S, Patten SB, Kwon CS, Dykeman J, et al. Prevalence and  
650 incidence of epilepsy: a systematic review and meta-analysis of international studies. *Neurology*  
651 2017;88(3):296-303.
- 652 [15] Fisher RS, Cross JH, French JA, Higurashi N, Hirsch E, Jansen FE, et al. Operational  
653 classification of seizure types by the International League Against Epilepsy: Position Paper of the  
654 ILAE Commission for Classification and Terminology. *Epilepsia* 2017;58(4):522-30.
- 655 [16] Frauscher B, Von Ellenrieder N, Zelmann R, Doležalová I, Minotti L, Olivier A, et al. Atlas of  
656 the normal intracranial electroencephalogram: neurophysiological awake activity in different cortical  
657 areas. *Brain* 2018;141(4):1130-44.
- 658 [17] Frauscher B, Gotman J. Sleep, oscillations, interictal discharges, and seizures in human  
659 focal epilepsy. *Neurobiol Disease* 2019;127:545-53.
- 660 [18] Gallagher RS, Sinha N, Pattnaik AR, Ojemann WK, Lucas A, LaRocque JJ, et al. Quantifying  
661 interictal intracranial EEG to predict focal epilepsy. *ArXiv* 2023;27.
- 662 [19] Gazit T, Doron I, Sagher O, Kohrman MH, Towle VL, Teicher M, et al. Time-frequency  
663 characterization of electrocorticographic recordings of epileptic patients using frequency-entropy  
664 similarity: A comparison to other bi-variate measures. *J Neurosci Meth* 2011;194(2):358-73.
- 665 [20] Greve DN, Fischl B. Accurate and robust brain image alignment using boundary-based  
666 registration. *Neuroimage* 2009;48(1):63-72.
- 667 [21] Grinenko O, Li J, Mosher JC, Wang IZ, Bulacio JC, Gonzalez-Martinez J, Nair D, et al. A  
668 fingerprint of the epileptogenic zone in human epilepsies. *Brain* 2018;141(1):117-31.
- 669 [22] Gunnarsdottir KM, Li A, Smith RJ, Kang JY, Korzeniewska A, Crone NE, et al. Source-sink  
670 connectivity: A novel interictal EEG marker for seizure localization. *Brain* 2022;145(11):3901-15.
- 671 [23] Hammers A, Allom R, Koepp MJ, Free SL, Myers R, Lemieux L, et al. Three-dimensional  
672 maximum probability atlas of the human brain, with particular reference to the temporal lobe. *Hum*  
673 *Brain Map* 2003;19(4):224-47.
- 674 [24] Hufnagel A, Dümpelmann M, Zentner J, Schijns O, Elger CE. Clinical relevance of quantified  
675 intracranial interictal spike activity in presurgical evaluation of epilepsy. *Epilepsia* 2000 ;41(4):467-  
676 78.
- 677 [25] Jeffreys H. *The theory of probability*. OuP Oxford 1998;6.
- 678 [26] Jiang H, Kokkinos V, Ye S, Urban A, Bagić A, Richardson M, He B. Interictal SEEG resting-  
679 state connectivity localizes the seizure onset zone and predicts seizure outcome. *Adv Sci*  
680 2022;9(18):2200887.
- 681 [27] Karimi-Rouzbahani H, Ramezani F, Woolgar A, Rich A, Ghodrati M. Perceptual difficulty  
682 modulates the direction of information flow in familiar face recognition. *NeuroImage*  
683 2021;233:117896.
- 684 [28] Karimi-Rouzbahani H, Shahmohammadi M, Vahab E, Setayeshi S, Carlson T. Temporal

- 685 variabilities provide additional category-related information in object category decoding: a systematic  
686 comparison of informative EEG features. *Neur Comput* 2021;33(11):3027-72.
- 687 [29] Karimi-Rouzbahani H, Woolgar A, Rich AN. Neural signatures of vigilance decrements  
688 predict behavioural errors before they occur. *eLife* 2021;10:e60563.
- 689 [30] Karimi-Rouzbahani H, Woolgar A, Henson R, Nili H. Caveats and nuances of model-based  
690 and model-free representational connectivity analysis. *Front Neurosci* 2022;16:755988.
- 691 [31] Karimi-Rouzbahani H, Woolgar A. When the whole is less than the sum of its parts:  
692 Maximum object category information and behavioral prediction in multiscale activation patterns.  
693 *Front Neurosci* 2022;16:825746.
- 694 [32] Karimi-Rouzbahani H, McGonigal A. Generalisability of epileptiform patterns across time and  
695 patients. *Sci Rep* 2024;14(1):6293.
- 696 [33] Kramer MA, Cash SS. Epilepsy as a disorder of cortical network organization. *The*  
697 *Neuroscientist* 2012;18(4):360-72.
- 698 [34] Kwan P, Brodie MJ. Early identification of refractory epilepsy. *New Eng J Med*  
699 2000;342(5):314-9.
- 700 [35] Lagarde S, Roehri N, Lambert I, Trebuchon A, McGonigal A, Carron R, et al. Interictal  
701 stereotactic-EEG functional connectivity in refractory focal epilepsies. *Brain* 2018;141(10):2966-80.
- 702 [36] Lagarde S, Buzori S, Trebuchon A, Carron R, Scavarda D, Milh M, et al. The repertoire of  
703 seizure onset patterns in human focal epilepsies: determinants and prognostic values. *Epilepsia*  
704 2019;60(1):85-95.
- 705 [37] Lee MD, Wagenmakers EJ. Bayesian statistical inference in psychology: comment on  
706 Trafimow 2003.
- 707 [38] Li A, Inati S, Zaghloul K, Sarma S. Fragility in epileptic networks: The epileptogenic zone.  
708 *American Control Conference* 2017;24: 2817-22.
- 709 [39] McGonigal A, Bartolomei F, Chauvel P. On seizure semiology. *Epilepsia* 2021;62(9):2019-  
710 35.
- 711 [40] Najm I, Jehi L, Palmi A, Gonzalez-Martinez J, Paglioli E, Bingaman W. Temporal patterns  
712 and mechanisms of epilepsy surgery failure. *Epilepsia* 2013;54(5):772-82.
- 713 [41] Pelliccia V, Avanzini P, Rizzi M, Caruana F, Tassi L, Francione S, et al. Association between  
714 semiology and anatomo-functional localization in patients with cingulate epilepsy: a cohort study.  
715 *Neurology* 2022;98(22):e2211-23.
- 716 [42] Plummer C, Vogrin SJ, Woods WP, Murphy MA, Cook MJ, Liley DT. Interictal and ictal  
717 source localization for epilepsy surgery using high-density EEG with MEG: a prospective long-term  
718 study. *Brain* 2019;142(4):932-51.
- 719 [43] Pruijm RH, Mennes M, van Rooij D, Llera A, Buitelaar JK, Beckmann CF. ICA-AROMA: A  
720 robust ICA-based strategy for removing motion artifacts from fMRI data. *Neuroimage* 2015;112:267-  
721 77.

- 722 [44] Roehri N, Pizzo F, Lagarde S, Lambert I, Nica A, McGonigal A, et al. High-frequency  
723 oscillations are not better biomarkers of epileptogenic tissues than spikes. *Annals Neurol*  
724 2018;83(1):84-97.
- 725 [45] Rouder JN, Morey RD, Speckman PL, Province JM. Default Bayes factors for ANOVA  
726 designs. *Journal of mathematical psychology* 2012;1;56(5):356-74.
- 727 [46] Ryvlin P, Barba C, Bartolomei F, Baumgartner C, Brazdil M, Fabo D, et al. Grading system  
728 for assessing the confidence in the epileptogenic zone reported in published studies: A Delphi  
729 consensus study. *Epilepsia* 2024;65(5):1346-59.
- 730 [47] Smith EH, Liou JY, Merricks EM, Davis T, Thomson K, Greger B, et al. Human interictal  
731 epileptiform discharges are bidirectional traveling waves echoing ictal discharges. *eLife*  
732 2022;11:e73541.
- 733 [48] Spencer SS. Neural networks in human epilepsy: evidence of and implications for treatment.  
734 *Epilepsia* 2002;43:3.
- 735 [49] Taylor PA, Saad ZS. FATCAT:(an efficient) functional and tractographic connectivity analysis  
736 toolbox. *Brain Connect* 2013; 3(5):523-35.
- 737 [50] Thomschewski A, Hincapié AS, Frauscher B. Localization of the epileptogenic zone using  
738 high frequency oscillations. *Front Neurol* 2019;10:94.
- 739 [51] Vogrin SJ, Plummer C. EEG Source Imaging—Clinical Considerations for EEG Acquisition  
740 and Signal Processing for Improved Temporo-Spatial Resolution. *J Clin Neuroph* 2024;41(1):8-18.
- 741 [52] Wendling F, Bellanger JJ, Bartolomei F, Chauvel P. Relevance of nonlinear lumped-  
742 parameter models in the analysis of depth-EEG epileptic signals. *Biol Cybern* 2000;83(4):367-78.
- 743 [53] Woolrich MW, Ripley BD, Brady M, Smith SM. Temporal autocorrelation in univariate linear  
744 modeling of fMRI data. *Neuroimage* 2001;14(6):1370-86.
- 745 [54] Zellner A, Siow A. Posterior odds ratios for selected regression hypotheses. *Trabajos*  
746 *Estadística y Investigación Operativa* 1980;31:585-603.
- 747  
748  
749  
750  
751  
752  
753  
754  
755

756  
757  
758  
759  
760

## Supplementary Materials

**Supplementary Table 1.** Location of each SEEG electrode contact in the brain according to Hammers 95 atlas. Rows indicate electrodes and columns indicate contact number with lower numbers being the most internal in the brain. x: no contact, WM: white matter, OUT: contact outside of the brain.

|           | 1                   | 2                   | 3                   | 4                   | 5                   | 6                          | 7                    | 8                    | 9                    | 10                  | 11                  | 12                  | 13                  | 14                  | 15                  | 16                  | 17                  | 18                  |
|-----------|---------------------|---------------------|---------------------|---------------------|---------------------|----------------------------|----------------------|----------------------|----------------------|---------------------|---------------------|---------------------|---------------------|---------------------|---------------------|---------------------|---------------------|---------------------|
| <b>S'</b> | R antcing           | R antcing           | R antcing           | L antcing           | L antcing           | L antcing                  | L antcing            | WM                   | WM                   | WM                  | WM                  | L Inf frontal gyrus | L Inf frontal gyrus | L Inf frontal gyrus | L Inf frontal gyrus | L Inf frontal gyrus | L Inf frontal gyrus | L Inf frontal gyrus |
| <b>N</b>  | R antcing           | R antcing           | R antcing           | WM                  | WM                  | WM                         | WM                   | R mid frontal sulcus | R mid frontal sulcus | R mid frontal gyrus | R Inf frontal gyrus | R Inf frontal gyrus | R Inf frontal gyrus | OUT                 | OUT                 | x                   | x                   | x                   |
| <b>M</b>  | R mid-cingulate     | R mid-cingulate     | WM                  | WM                  | WM                  | WM                         | R Inf frontal gyrus  | R Inf frontal gyrus  | R Inf frontal gyrus  | WM                  | R Inf frontal gyrus | R frontal operculum | OUT                 | OUT                 | OUT                 | x                   | x                   | x                   |
| <b>FD</b> | Frontal_Sup_MedialR | Frontal_Sup_MedialR | Frontal_Sup_MedialR | WM                  | WM                  | RSFS                       | RSFS                 | RSFS                 | WM                   | WM                  | R mid frontal gyrus | R mid frontal gyrus | R mid frontal gyrus | OUT                 | OUT                 | x                   | x                   | x                   |
| <b>PM</b> | R pre-SMA           | R pre-SMA           | R pre-SMA           | WM                  | RSFS                | RSFS                       | R mid frontal gyrus  | R mid frontal gyrus  | R mid frontal gyrus  | R mid frontal gyrus | R mid frontal gyrus | R mid frontal gyrus | OUT                 | OUT                 | OUT                 | x                   | x                   | x                   |
| <b>O'</b> | L rectus gyrus      | L rectus gyrus      | L rectus gyrus      | WM                  | WM                  | L mid orbitofrontal cortex | orbitofrontal cortex | orbitofrontal cortex | orbitofrontal cortex | WM                  | Left lat OF cortex  | Left lat OF cortex  | Left lat OF cortex  | OUT                 | OUT                 | x                   | x                   | x                   |
| <b>M'</b> | L midcing           | L midcing           | WM                  | WM                  | WM                  | WM                         | WM                   | WM                   | L inf frontal gyrus  | L inf frontal gyrus | L inf frontal gyrus | L inf frontal gyrus | L inf frontal gyrus | OUT                 | OUT                 | x                   | x                   | x                   |
| <b>TP</b> | R mesial temp pole  | R mesial temp pole  | R inf temp gyrus    | R inf temp gyrus    | R inf temp gyrus    | R inf temp gyrus           | R inf temp gyrus     | R inf temp gyrus     | R inf temp gyrus     | OUT                 | OUT                 | OUT                 | x                   | x                   | x                   | x                   | x                   | x                   |
| <b>A</b>  | R amygd             | R amygd             | R amygd             | R amygd             | WM                  | WM                         | R mid temp gyrus     | R mid temp gyrus     | R mid temp gyrus     | R mid temp gyrus    | R mid temp gyrus    | R mid temp gyrus    | OUT                 | OUT                 | OUT                 | x                   | x                   | x                   |
| <b>T</b>  | R inf insula        | R inf insula        | R inf insula        | Perisylv space      | Perisylv space      | R sup temp gyrus           | temp gyrus           | temp gyrus           | temp gyrus           | OUT                 | x                   | x                   | x                   | x                   | x                   | x                   | x                   | x                   |
| <b>I</b>  | R dorsal ant insula | R dorsal ant insula | R dorsal ant insula | R frontal operculum | R frontal operculum | WM                         | WM                   | R inf frontal gyrus  | R inf frontal gyrus  | R mid frontal gyrus | R mid frontal gyrus | R mid frontal gyrus | R mid frontal gyrus | R mid frontal gyrus | OUT                 | OUT                 | OUT                 | OUT                 |
| <b>Q</b>  | R post insula       | R post insula       | WM                  | R Rolandic operc    | R Rolandic operc    | R Rolandic operc           | R post central gyrus | R post central gyrus | R post central gyrus | OUT                 | x                   | x                   | x                   | x                   | x                   | x                   | x                   | x                   |
| <b>X</b>  | R post cingulate    | R post cingulate    | R post cingulate    | WM                  | WM                  | WM                         | WM                   | WM                   | WM                   | WM                  | R supramarg gyrus   | R supramarg gyrus   | R supramarg gyrus   | OUT                 | OUT                 | x                   | x                   | x                   |
| <b>P</b>  | R precuneus         | R precuneus         | WM                  | WM                  | R sup parietal lob  | R sup parietal lob         | R sup parietal lob   | R sup parietal lob   | R sup parietal lob   | R sup parietal lob  | R sup parietal lob  | R sup parietal lob  | R sup parietal lob  | R sup parietal lob  | OUT                 | x                   | x                   | x                   |

761  
762

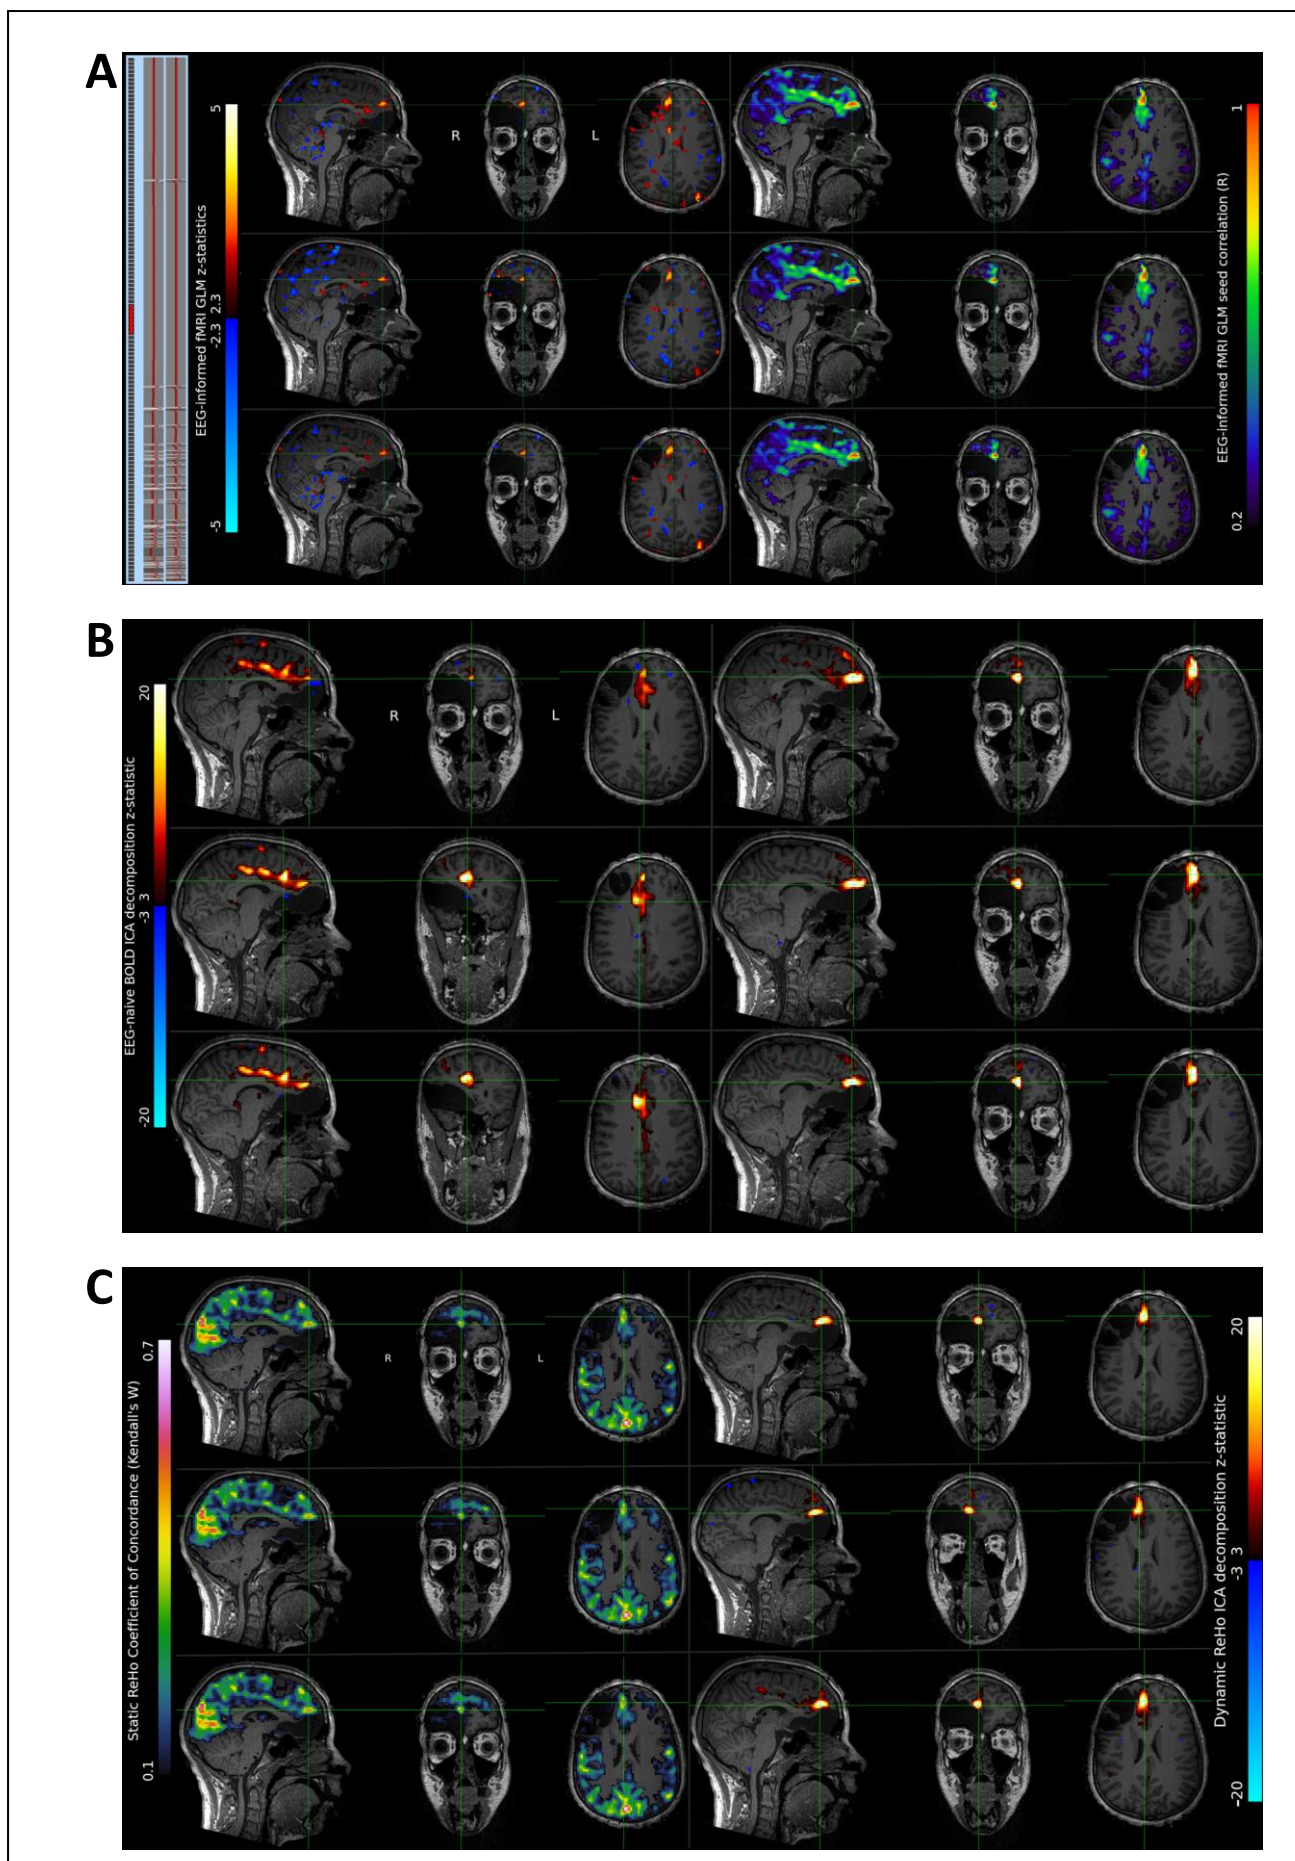

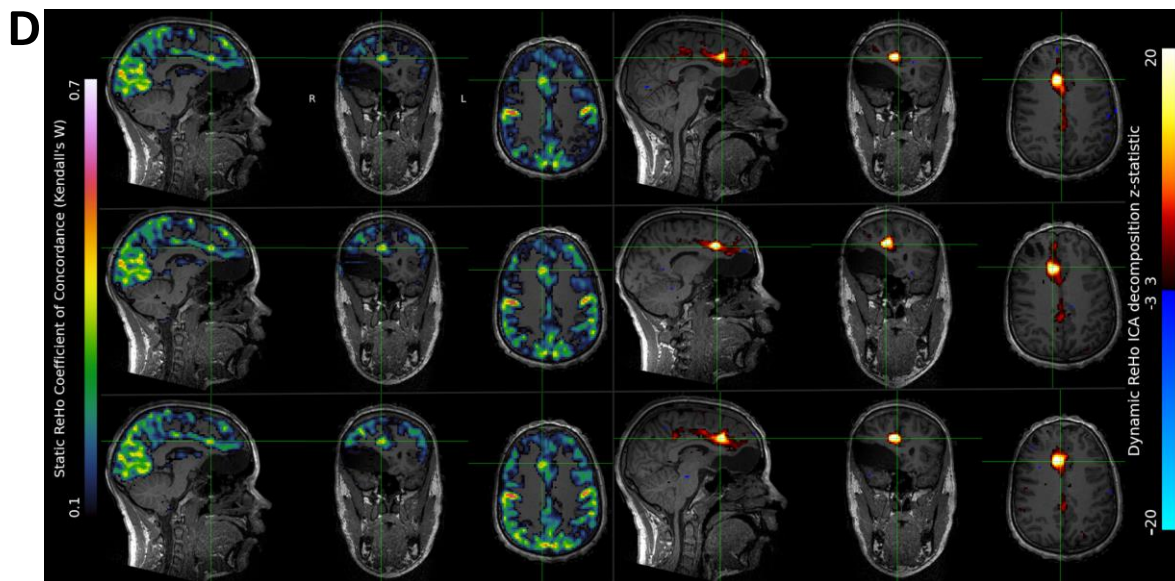

**Supplementary figure 1.** Additional fMRI analyses. **A**, an EEG-informed GLM analysis from manually identified interictal epileptiform discharges using denoised fMRI data (regressor of epileptiform event timings and their temporal derivative shown at far left) highlights maximal response at the right mesial frontal region. Three-row panels (Upper, 24.37ms; Middle, 38.14ms; Lower, 51.91ms) represent sagittal, coronal and axial views of results from independent preprocessing and analysis of simultaneous acquired Multi-echo multi-band fMRI from these increasing Echo time (TE), respectively. The maximal right mesial frontal voxel from each analysis was used to generate a Pearson's R seed correlation map, highlighting consistent connectivity patterns involving the cingulate cortex in these same three planes. **B**, two EZ candidates for the epileptogenic zone identified from EEG-naïve Independent Component Analysis of the denoised multi-echo multi-band fMRI data acquired during simultaneous high-density EEG-fMRI. The three echo time fMRI datasets (Panels: Upper 24.37, Middle 38.14 and Lower 51.91ms) captured consistent spatial ICA maps (shown in sagittal, coronal and axial) involving the right cingulate cortex and right mesial frontal cortex, respectively, across each panel, highlighting minor variation likely from effects of echo dependence on BOLD signal. **C**, right mesial frontal EZ candidate identified from static Regional Homogeneity (ReHo) connectivity map (using Kendall's W coefficient of concordance; left sagittal, coronal and axial MRI overlays) and identification of spatial ICA sub-component from dynamic ReHo z-statistical map (right set of orthogonal MRI overlays), across the three independent TE time series panels representing (Upper 24.37, Middle 38.14ms and Lower 51.91ms denoised datasets respectively). The static ReHo map clearly identifies areas of higher local connections commonly associated with visual functional connectivity posteriorly in the occipital cortex, but whole brain thresholding of such measures cannot automatically identify culprit generators for the EZ. The ICA subcomponents from dynamic ReHo do allow for interrogating independent variations in localised functional connectivity. **D**, right anterior cingulate EZ candidate suggested from static Regional Homogeneity (ReHo) connectivity map (using Kendall's W coefficient of concordance; left sagittal, coronal and axial MRI overlays) and identification of spatial ICA sub-component from dynamic ReHo z-statistical map (right set of orthogonal MRI overlays), across the three independent TE time series panels representing (Upper 24.37, Middle 38.14ms and Lower 51.91ms datasets respectively). The static ReHo map identifies a discrete area of higher local connections at the right anterior cingulate cortex, but the dynamic ReHo ICA analysis offers evidence for the extent of the nodal region involved in generating coherent activity, including reference to slightly weaker statistical involvement with the mesial frontal and mid-cingulate cortex. Such patterns may help discern complex nodal interactions from non-invasive modalities for subsequent verification by invasive modalities such as SEEG.

765

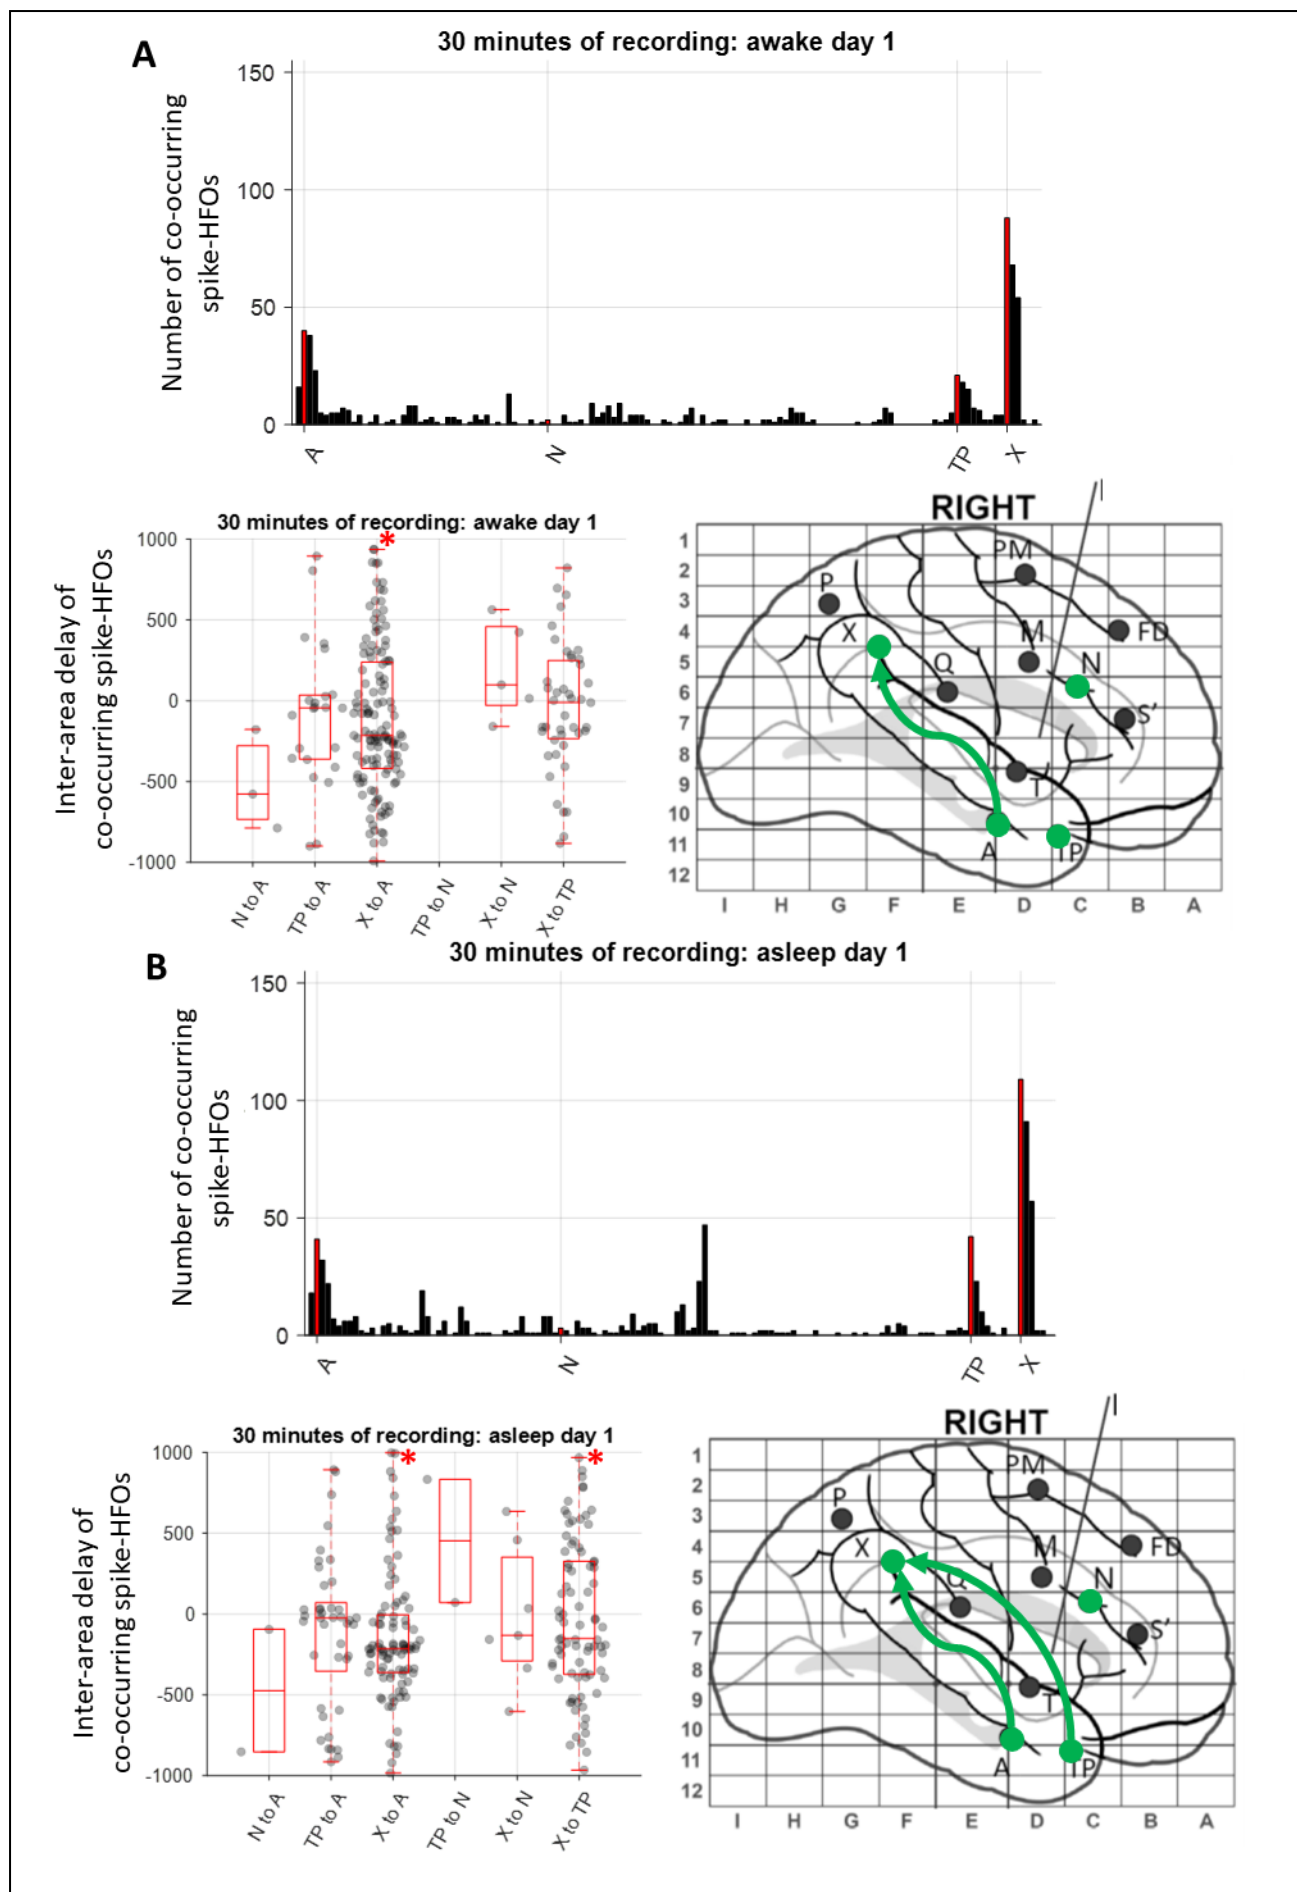

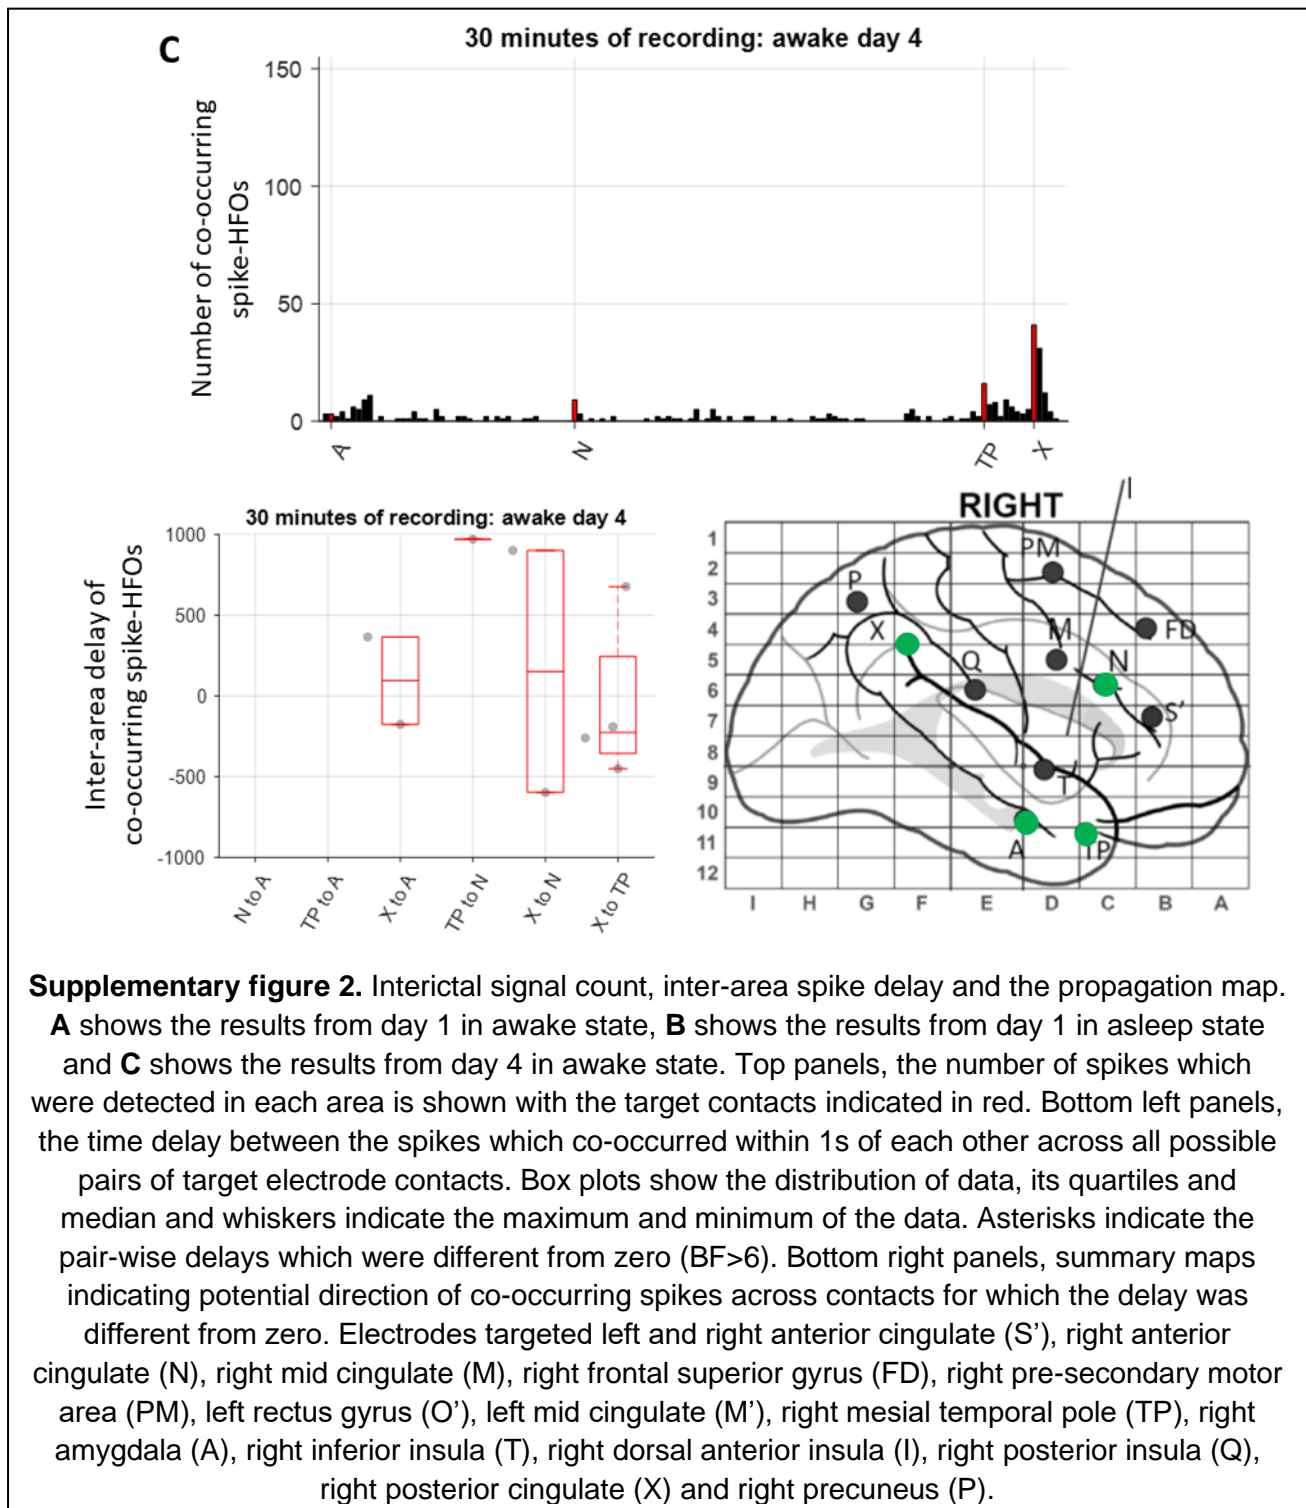

766

767

768

769

770
